# Supplementary material for: Toward a Renewables-Driven Industrial Landscape: Evidence on investment decisions in the Chemical and Steel Sectors
Source: Research Square preprint supplement (doi:10.21203/rs.3.rs-5519615/v1), 2025-02-28
Supplement: Supplementary file 1 [file 4abb798c21d210543b4768a6.xlsx]

## Sheet: Questions
Questions
Industry	Which best describes the industry you work in?
Investment_decision	Do you invest in steel or chemical industries?
region_HQ	In which world region is your company's headquarters located?
region_working	In which world region do you currently work?
Prof_Experience	How many years of professional experience do you have in the sector that you currently work in?
Curr_position	How would you characterize your current position?
Role	Which best describes your role relating to your company's future investments/strategy about decarbonization?
level_expertise	How would you assess your level of expertise related to questions of decarbonization in your industry? (Self-Assessment)
Steel
Q1	Green hydrogen can enable the decarbonization of production processes in the chemical and steel sector. Against this background, please indicate your level of agreement or disagreement with the following statements. [The associated changes will significantly alter the geographic distribution of production in your COMPANY by 2050? ]
Q2	Green hydrogen can enable the decarbonization of production processes in the chemical and steel sector. Against this background, please indicate your level of agreement or disagreement with the following statements. [The associated changes will significantly alter the geographic distribution of production in your INDUSTRY by 2050? ]
Q3	Green hydrogen can enable the decarbonization of production processes in the chemical and steel sector. Against this background, please indicate your level of agreement or disagreement with the following statements. [Hydrogen-based direct-reduction of iron will be the dominant strategy for the decarbonization of global steel production by 2050. ]
Q4	Green hydrogen can enable the decarbonization of production processes in the chemical and steel sector. Against this background, please indicate your level of agreement or disagreement with the following statements. [Green hydrogen (i.e. hydrogen produced with renewable electricity) will represent one of the dominant forms of hydrogen in use for the decarbonization of global steel production by 2…
Q5	Green hydrogen can enable the decarbonization of production processes in the chemical and steel sector. Against this background, please indicate your level of agreement or disagreement with the following statements. [Blue hydrogen (i.e. hydrogen produced from natural gas with carbon capture and storage technologies) will represent one of the dominant forms of hydrogen in use for the decarbonizati…
Q6	There are several factors that might influence where companies in your sector operate and invest in climate-friendly production (see list below). Please indicate to what extent you agree or disagree that these factors will influence locational investment decisions in climate-friendly production in your industry by 2050. [Proximity to low-cost renewable energy as a resource for green hydrogen ]
Q7	There are several factors that might influence where companies in your sector operate and invest in climate-friendly production (see list below). Please indicate to what extent you agree or disagree that these factors will influence locational investment decisions in climate-friendly production in your industry by 2050. [Trade policy measures, such as tariffs, quotas or domestic content requireme…
Q8	There are several factors that might influence where companies in your sector operate and invest in climate-friendly production (see list below). Please indicate to what extent you agree or disagree that these factors will influence locational investment decisions in climate-friendly production in your industry by 2050. [Access to subsidies or tax breaks for climate-friendly investments ]
Q9	There are several factors that might influence where companies in your sector operate and invest in climate-friendly production (see list below). Please indicate to what extent you agree or disagree that these factors will influence locational investment decisions in climate-friendly production in your industry by 2050. [Geopolitical tensions and alliances]
Q10	There are several factors that might influence where companies in your sector operate and invest in climate-friendly production (see list below). Please indicate to what extent you agree or disagree that these factors will influence locational investment decisions in climate-friendly production in your industry by 2050. [The location of existing steel/chemical production ]
Q11	There are several factors that might influence where companies in your sector operate and invest in climate-friendly production (see list below). Please indicate to what extent you agree or disagree that these factors will influence locational investment decisions in climate-friendly production in your industry by 2050. [Carbon pricing and emission trading schemes]
Q12	There are several factors that might influence where companies in your sector operate and invest in climate-friendly production (see list below). Please indicate to what extent you agree or disagree that these factors will influence locational investment decisions in climate-friendly production in your industry by 2050. [The EU’s carbon-border adjustment mechanism (CBAM)]
Q13	There are several factors that might influence where companies in your sector operate and invest in climate-friendly production (see list below). Please indicate to what extent you agree or disagree that these factors will influence locational investment decisions in climate-friendly production in your industry by 2050. [Proximity to low cost low natural gas as a feedstock for blue hydrogen ]
Q14	Which five factors are the most important for investing in climate-friendly production site in your industry? [Rank 1]
Q15	Which five factors are the most important for investing in climate-friendly production site in your industry? [Rank 2]
Q16	Which five factors are the most important for investing in climate-friendly production site in your industry? [Rank 3]
Q17	Which five factors are the most important for investing in climate-friendly production site in your industry? [Rank 4]
Q18	Which five factors are the most important for investing in climate-friendly production site in your industry? [Rank 5]
Chemical
Q19	Green hydrogen can enable the decarbonization of production processes in the chemical and steel sector. Against this background, please indicate your level of agreement or disagreement with the following statements. [The associated changes will significantly alter the geographic distribution of production in your COMPANY by 2050? ]
Q20	Green hydrogen can enable the decarbonization of production processes in the chemical and steel sector. Against this background, please indicate your level of agreement or disagreement with the following statements. [The associated changes will significantly alter the geographic distribution of production in your INDUSTRY by 2050? ]
Q21	Green hydrogen can enable the decarbonization of production processes in the chemical and steel sector. Against this background, please indicate your level of agreement or disagreement with the following statements. [Hydrogen will represent one of the dominant feedstocks within a climate-friendly chemical industry by 2050.]
Q22	Green hydrogen can enable the decarbonization of production processes in the chemical and steel sector. Against this background, please indicate your level of agreement or disagreement with the following statements. [Green hydrogen (i.e. hydrogen produced with renewable electricity) will be represent one of the dominant forms of hydrogen in use for the decarbonization of global chemical industrie…
Q23	Green hydrogen can enable the decarbonization of production processes in the chemical and steel sector. Against this background, please indicate your level of agreement or disagreement with the following statements. [Blue hydrogen (i.e. hydrogen produced from natural gas with carbon capture and storage technologies) will represent one of the dominant forms of hydrogen in use for the decarbonizati…
Q24	There are several factors that might influence where companies in your sector operate and invest in climate-friendly production (see list below). Please indicate to what extent you agree or disagree that these factors will influence locational investment decisions in climate-friendly production in your industry by 2050. [Proximity to low-cost renewable energy as a resource for green hydrogen ]
Q25	There are several factors that might influence where companies in your sector operate and invest in climate-friendly production (see list below). Please indicate to what extent you agree or disagree that these factors will influence locational investment decisions in climate-friendly production in your industry by 2050. [Trade policy measures, such as tariffs, quotas or domestic content requireme…
Q26	There are several factors that might influence where companies in your sector operate and invest in climate-friendly production (see list below). Please indicate to what extent you agree or disagree that these factors will influence locational investment decisions in climate-friendly production in your industry by 2050. [Access to subsidies or tax breaks for climate-friendly investments ]
Q27	There are several factors that might influence where companies in your sector operate and invest in climate-friendly production (see list below). Please indicate to what extent you agree or disagree that these factors will influence locational investment decisions in climate-friendly production in your industry by 2050. [Geopolitical tensions and alliances]
Q28	There are several factors that might influence where companies in your sector operate and invest in climate-friendly production (see list below). Please indicate to what extent you agree or disagree that these factors will influence locational investment decisions in climate-friendly production in your industry by 2050. [The location of existing steel/chemical production ]
Q29	There are several factors that might influence where companies in your sector operate and invest in climate-friendly production (see list below). Please indicate to what extent you agree or disagree that these factors will influence locational investment decisions in climate-friendly production in your industry by 2050. [Carbon pricing and emission trading schemes]
Q30	There are several factors that might influence where companies in your sector operate and invest in climate-friendly production (see list below). Please indicate to what extent you agree or disagree that these factors will influence locational investment decisions in climate-friendly production in your industry by 2050. [The EU’s carbon-border adjustment mechanism (CBAM)]
Q31	There are several factors that might influence where companies in your sector operate and invest in climate-friendly production (see list below). Please indicate to what extent you agree or disagree that these factors will influence locational investment decisions in climate-friendly production in your industry by 2050. [Proximity to low cost low natural gas as a feedstock for blue hydrogen ]
Q32	Which five factors are the most important for investing in climate-friendly production site in your industry? [Rank 1]
Q33	Which five factors are the most important for investing in climate-friendly production site in your industry? [Rank 2]
Q34	Which five factors are the most important for investing in climate-friendly production site in your industry? [Rank 3]
Q35	Which five factors are the most important for investing in climate-friendly production site in your industry? [Rank 4]
Q36	Which five factors are the most important for investing in climate-friendly production site in your industry? [Rank 5]

## Sheet: Dataset
ID	Response ID	MID	Industry1	Industry2	Industry	Region	Region1	Experience	Position	Role	Expertise	Q1	Q2	Q3	Q4	Q5	Q6	Q7	Q8	Q9	Q10	Q11	Q12	Q13	Q14	Q15	Q16	Q17	Q18	Q19	Q20	Q21	Q22	Q23	Q24	Q25	Q26	Q27	Q28	Q29	Q30	Q31	Q32	Q33	Q34	Q35	Q36
1	11	J472YXN	Steel		Steel	Europe	Europe	6-9 Years	Vice President or Above	Inflence and make decisions	Expert	Strongly agree	Strongly agree	Agree	Strongly agree	Strongly agree	Strongly agree	Strongly agree	Agree	Strongly agree	Strongly agree	Agree	Strongly agree	Agree	Location of existing production site	Geopolitical tensions and alliances	Low labor costs	Skilled workforce	Proximity to industrial clusters in your sector or a related sector
2	12	7mZdv6v	Steel		Steel	Europe	Europe	6-9 Years	Vice President or Above	Inflence and make decisions	Expert	Strongly agree	Strongly agree	Strongly agree	Agree	Agree	Strongly agree	Agree	Strongly agree	Strongly agree	Agree	Strongly agree	Agree	Strongly agree	Location of existing production site	Geopolitical tensions and alliances	Trade barriers, such as tariffs, quotas or local content requirements	Skilled workforce	Proximity to industrial clusters in your sector or a related sector
3	13	Ar9Qn2A	Steel		Steel	Latin America	Latin America	6-9 Years	Senior Director or Senior Manager	Inflence and make decisions	Expert	Agree	Agree	Strongly agree	Strongly agree	Agree	Strongly agree	Agree	Agree	Disagree	Strongly agree	Strongly agree	Agree	Agree	Supportive policy framework with access to government subsidies or tax breaks for climate-friendly investments	Proximity to low-cost renewable energy as a resource for green hydrogen	Proximity to low cost low natural gas as a feedstock for blue hydrogen	Overall investment climate and financing conditions/capital costs	Low labor costs
4	17	jvyzMme	Steel		Steel	North America	North America	10+ Years	Senior Director or Senior Manager	Inflence and make decisions	Expert	Strongly agree	Agree	Strongly agree	Agree	Agree	Strongly agree	Agree	Agree	Strongly agree	Strongly agree	Agree	Strongly agree	Strongly agree	Supportive policy framework with access to government subsidies or tax breaks for climate-friendly investments	Low labor costs	Proximity to markets for climate-friendly industrial products	Geopolitical tensions and alliances	Proximity to low-cost renewable energy as a resource for green hydrogen
5	24	XV1gdmP	Steel		Steel	Europe	Europe	10+ Years	Senior Director or Senior Manager	Inflence and make decisions	Expert	Strongly agree	Agree	Agree	Strongly agree	Agree	Agree	Strongly agree	Agree	Strongly agree	Agree	Strongly agree	Agree	Agree	Location of existing production site	Supportive policy framework with access to government subsidies or tax breaks for climate-friendly investments	Skilled workforce	Proximity to markets for climate-friendly industrial products	Overall investment climate and financing conditions/capital costs
6	27	ErA5eLb	Steel		Steel	North America	North America	6-9 Years	C-Level	Inflence and make decisions	Informed, but not an expert	Agree	Agree	Agree	Agree	Agree	Agree	Strongly agree	Agree	Strongly agree	Disagree	Agree	Disagree	Agree	Proximity to low-cost renewable energy as a resource for green hydrogen	Location of existing production site	Low labor costs	Proximity to markets for climate-friendly industrial products	Overall investment climate and financing conditions/capital costs
7	29	J4726qR	Chemical		Chemical	North America	North America	6-9 Years	Senior Director or Senior Manager	Inflence and make decisions	Expert																			Strongly agree	Agree	Agree	Strongly agree	Agree	Strongly agree	Agree	Agree	Strongly agree	Strongly agree	Agree	Strongly agree	Agree	Proximity to low-cost renewable energy as a resource for green hydrogen	Proximity to markets for climate-friendly industrial products	Supportive policy framework with access to government subsidies or tax breaks for climate-friendly investments	Proximity to industrial clusters in your sector or a related sector	Overall investment climate and financing conditions/capital costs
8	32	davGVR1	Steel		Steel	Europe	Europe	6-9 Years	C-Level	Inflence and make decisions	Expert	Agree	Agree	Strongly agree	Agree	Strongly agree	Strongly agree	Agree	Strongly agree	Agree	Strongly agree	Agree	Strongly agree	Agree	Location of existing production site	Geopolitical tensions and alliances	Trade barriers, such as tariffs, quotas or local content requirements	Skilled workforce	Proximity to low-cost renewable energy as a resource for green hydrogen
9	33	bGxy956	Steel		Steel	Europe	Europe	6-9 Years	C-Level	Inflence and make decisions	Expert	Strongly agree	Agree	Agree	Strongly agree	Agree	Strongly agree	Agree	Strongly agree	Agree	Strongly agree	Agree	Agree	Strongly agree	Location of existing production site	Geopolitical tensions and alliances	Supportive policy framework with access to government subsidies or tax breaks for climate-friendly investments	Trade barriers, such as tariffs, quotas or local content requirements	Proximity to low-cost renewable energy as a resource for green hydrogen
10	37	R7XRBg0	Steel		Steel	Europe	Europe	10+ Years	Senior Director or Senior Manager	Inflence and make decisions	Expert	Disagree	Agree	Agree	Strongly agree	Agree	Agree	Strongly agree	Agree	Strongly agree	Strongly agree	Agree	Agree	Strongly agree	Geopolitical tensions and alliances	Low labor costs	Supportive policy framework with access to government subsidies or tax breaks for climate-friendly investments	Skilled workforce	Proximity to markets for climate-friendly industrial products
11	40	1nz9mMm	Chemical		Chemical	Asia	Asia	10+ Years	Senior Director or Senior Manager	Inflence and make decisions	Expert																			Strongly agree	Strongly agree	Agree	Strongly agree	Agree	Agree	Strongly agree	Strongly agree	Agree	Disagree	Agree	Agree	Strongly agree	Proximity to low-cost renewable energy as a resource for green hydrogen	Skilled workforce	Proximity to markets for climate-friendly industrial products	Logistical infrastructure conditions	Trade barriers, such as tariffs, quotas or local content requirements
12	41	Nj8p479	Chemical		Chemical	Asia	Asia	10+ Years	Senior Director or Senior Manager	Inflence and make decisions	Expert																			Agree	Strongly agree	Strongly agree	Agree	Strongly agree	Strongly agree	Agree	Agree	Strongly agree	Strongly agree	Agree	Strongly agree	Agree	Proximity to low-cost renewable energy as a resource for green hydrogen	Trade barriers, such as tariffs, quotas or local content requirements	Supportive policy framework with access to government subsidies or tax breaks for climate-friendly investments	Skilled workforce	Proximity to industrial clusters in your sector or a related sector
13	42	rMLpeBz	Steel		Steel	North America	North America	6-9 Years	Vice President or Above	Inflence and make decisions	Expert	Strongly disagree	Agree	Agree	Agree	Strongly agree	Agree	Agree	Disagree	Agree	Strongly agree	Agree	Agree	Agree	Location of existing production site	Proximity to low-cost renewable energy as a resource for green hydrogen	Low labor costs	Geopolitical tensions and alliances	Trade barriers, such as tariffs, quotas or local content requirements
14	45	aAan61q	Steel		Steel	North America	North America	3-5 Years	C-Level	Influence, but don't make decisions	Informed, but not an expert	Disagree	Agree	Agree	Agree	Disagree	Disagree	Disagree	Agree	Disagree	Disagree	Agree	Agree	Disagree	Proximity to low-cost renewable energy as a resource for green hydrogen	Low labor costs	Trade barriers, such as tariffs, quotas or local content requirements	Geopolitical tensions and alliances	Supportive policy framework with access to government subsidies or tax breaks for climate-friendly investments
15	47	lv7n49Y	Steel		Steel	North America	North America	3-5 Years	Vice President or Above	Inflence and make decisions	Expert	Strongly agree	Agree	Agree	Strongly agree	Agree	Strongly agree	Agree	Strongly agree	Agree	Strongly agree	Agree	Agree	Strongly agree	Location of existing production site	Supportive policy framework with access to government subsidies or tax breaks for climate-friendly investments	Geopolitical tensions and alliances	Skilled workforce	Trade barriers, such as tariffs, quotas or local content requirements
16	48	eZG8peM	Steel		Steel	North America	North America	10+ Years	Senior Director or Senior Manager	Inflence and make decisions	Expert	Agree	Disagree	Disagree	Strongly agree	Disagree	Strongly agree	Agree	Strongly agree	Agree	Agree	Strongly agree	Strongly agree	Agree	Geopolitical tensions and alliances	Trade barriers, such as tariffs, quotas or local content requirements	Proximity to markets for climate-friendly industrial products	Overall investment climate and financing conditions/capital costs	Location of existing production site
17	49	P7LRz6O	Steel		Steel	North America	North America	3-5 Years	Senior Director or Senior Manager	Influence, but don't make decisions	Informed, but not an expert	Strongly agree	Agree	Agree	Agree	Agree	Strongly agree	Agree	I don't know	Agree	Strongly agree	Strongly agree	Strongly agree	Strongly agree	Low labor costs	Proximity to low cost low natural gas as a feedstock for blue hydrogen	Supportive policy framework with access to government subsidies or tax breaks for climate-friendly investments	Proximity to low-cost renewable energy as a resource for green hydrogen	Location of existing production site
18	53	pv80NAm	Steel		Steel	North America	North America	10+ Years	Senior Director or Senior Manager	Inflence and make decisions	Expert	Strongly agree	I don't know	Strongly agree	Strongly agree	Strongly agree	Disagree	Agree	Strongly disagree	Strongly disagree	Strongly agree	Strongly agree	Disagree	Disagree	Overall investment climate and financing conditions/capital costs	Proximity to industrial clusters in your sector or a related sector	Logistical infrastructure conditions	Trade barriers, such as tariffs, quotas or local content requirements	Supportive policy framework with access to government subsidies or tax breaks for climate-friendly investments
19	56	R7XRBWy	Steel		Steel	Africa	Africa	10+ Years	Vice President or Above	Inflence and make decisions	Expert	Agree	Agree	Agree	Strongly agree	Strongly agree	Agree	Agree	Disagree	Agree	Agree	Strongly agree	Strongly agree	Agree	Proximity to low-cost renewable energy as a resource for green hydrogen	Overall investment climate and financing conditions/capital costs	Proximity to low cost low natural gas as a feedstock for blue hydrogen	Trade barriers, such as tariffs, quotas or local content requirements	Proximity to markets for climate-friendly industrial products
20	57	Nj8p5zP	Chemical		Chemical	North America	North America	3-5 Years	C-Level	Inflence and make decisions	Expert																			Agree	Agree	Strongly agree	Strongly agree	Agree	Agree	Strongly agree	Agree	Agree	Strongly agree	Agree	Disagree	Strongly agree	Supportive policy framework with access to government subsidies or tax breaks for climate-friendly investments	Trade barriers, such as tariffs, quotas or local content requirements	Skilled workforce	Geopolitical tensions and alliances	Proximity to industrial clusters in your sector or a related sector
21	59	J4726JR	Steel		Steel	Europe	Europe	6-9 Years	C-Level	Inflence and make decisions	Expert	Strongly agree	Strongly agree	Agree	Agree	Strongly agree	Strongly agree	Agree	Strongly agree	Agree	Strongly agree	Strongly agree	Agree	Strongly agree	Location of existing production site	Geopolitical tensions and alliances	Trade barriers, such as tariffs, quotas or local content requirements	Skilled workforce	Proximity to industrial clusters in your sector or a related sector
22	60	2vOo96G	Steel		Steel	Europe	Europe	6-9 Years	Senior Director or Senior Manager	Inflence and make decisions	Expert	Strongly agree	Strongly agree	Agree	Agree	Strongly agree	Strongly agree	Agree	Strongly agree	Agree	Strongly agree	Agree	Strongly agree	Agree	Proximity to low-cost renewable energy as a resource for green hydrogen	Trade barriers, such as tariffs, quotas or local content requirements	Skilled workforce	Low labor costs	Proximity to markets for climate-friendly industrial products
23	63	5oKdOPE	Steel		Steel	Europe	Europe	6-9 Years	Subject Matter Expert	Inflence and make decisions	Expert	Agree	Agree	Strongly agree	Strongly agree	Strongly agree	Strongly agree	Agree	Strongly agree	Agree	Strongly agree	Agree	Strongly agree	Agree	Geopolitical tensions and alliances	Low labor costs	Trade barriers, such as tariffs, quotas or local content requirements	Skilled workforce	Proximity to markets for climate-friendly industrial products
24	65	J472Qpa	Steel		Steel	Europe	Europe	6-9 Years	Senior Director or Senior Manager	Inflence and make decisions	Expert	Strongly agree	Agree	Strongly agree	Agree	Strongly agree	Strongly agree	Agree	Strongly agree	Agree	Strongly agree	Strongly agree	Agree	Strongly agree	Low labor costs	Supportive policy framework with access to government subsidies or tax breaks for climate-friendly investments	Trade barriers, such as tariffs, quotas or local content requirements	Skilled workforce	Proximity to markets for climate-friendly industrial products
25	70	jvyz52p	Steel		Steel	Africa	Africa	10+ Years	Vice President or Above	Inflence and make decisions	Expert	Disagree	Agree	Disagree	Strongly agree	Agree	Strongly agree	Disagree	Strongly agree	Agree	Agree	Strongly agree	Strongly agree	Disagree	Location of existing production site	Low labor costs	Supportive policy framework with access to government subsidies or tax breaks for climate-friendly investments	Proximity to industrial clusters in your sector or a related sector	Logistical infrastructure conditions
26	71	bGxb0bM	Steel		Steel	Europe	Europe	10+ Years	Senior Director or Senior Manager	Inflence and make decisions	Expert	Agree	Strongly agree	Strongly disagree	Strongly agree	Agree	Strongly agree	Agree	Strongly agree	Strongly agree	Agree	Strongly agree	Strongly agree	Agree	Proximity to low-cost renewable energy as a resource for green hydrogen	Trade barriers, such as tariffs, quotas or local content requirements	Low labor costs	Skilled workforce	Supportive policy framework with access to government subsidies or tax breaks for climate-friendly investments
27	72	2vO0804	Chemical		Chemical	Africa	Africa	10+ Years	Vice President or Above	Inflence and make decisions	Expert																			Agree	Strongly agree	Strongly agree	Agree	Strongly disagree	Agree	Strongly agree	Disagree	Agree	Agree	Strongly disagree	Disagree	Strongly agree	Proximity to low-cost renewable energy as a resource for green hydrogen	Geopolitical tensions and alliances	Supportive policy framework with access to government subsidies or tax breaks for climate-friendly investments	Trade barriers, such as tariffs, quotas or local content requirements	Skilled workforce
28	73	vzOKRKR	Chemical		Chemical	Africa	Africa	6-9 Years	Vice President or Above	Inflence and make decisions	Expert																			Agree	Strongly agree	Disagree	Agree	Agree	Strongly agree	Disagree	Agree	Agree	Agree	Disagree	Strongly agree	Agree	Location of existing production site	Proximity to markets for climate-friendly industrial products	Trade barriers, such as tariffs, quotas or local content requirements	Low labor costs	Proximity to industrial clusters in your sector or a related sector
29	74	n2onynX	Steel		Steel	Africa	Africa	6-9 Years	C-Level	Inflence and make decisions	Expert	Agree	Strongly agree	Agree	Disagree	Agree	Strongly agree	Disagree	Agree	Agree	Agree	Strongly agree	Strongly agree	Disagree	Proximity to low-cost renewable energy as a resource for green hydrogen	Geopolitical tensions and alliances	Trade barriers, such as tariffs, quotas or local content requirements	Supportive policy framework with access to government subsidies or tax breaks for climate-friendly investments	Low labor costs
30	77	XV1ZLYl	Chemical		Chemical	Africa	Africa	6-9 Years	Vice President or Above	Inflence and make decisions	Expert																			Strongly agree	Disagree	Agree	Agree	Disagree	Strongly agree	Disagree	Agree	Agree	Strongly agree	Agree	Agree	Disagree	Geopolitical tensions and alliances	Skilled workforce	Proximity to markets for climate-friendly industrial products	Low labor costs	Supportive policy framework with access to government subsidies or tax breaks for climate-friendly investments
31	82	Ar96goW	Steel		Steel	North America	North America	3-5 Years	Senior Director or Senior Manager	Influence, but don't make decisions	Informed, but not an expert	Agree	Agree	Agree	Strongly agree	Agree	Agree	Agree	Agree	Agree	Agree	Agree	Agree	Agree	Proximity to low-cost renewable energy as a resource for green hydrogen	Supportive policy framework with access to government subsidies or tax breaks for climate-friendly investments	Skilled workforce	Proximity to markets for climate-friendly industrial products	Logistical infrastructure conditions
32	83	P7Ly0A1	Steel		Steel	North America	North America	3-5 Years	Senior Director or Senior Manager	Inflence and make decisions	Expert	Agree	Agree	Agree	Agree	Agree	Agree	Strongly agree	Agree	Agree	Strongly agree	Strongly agree	Agree	Agree	Skilled workforce	Proximity to industrial clusters in your sector or a related sector	Supportive policy framework with access to government subsidies or tax breaks for climate-friendly investments	Trade barriers, such as tariffs, quotas or local content requirements	Geopolitical tensions and alliances
33	84	8G05O5P	Steel		Steel	Africa	Africa	6-9 Years	Senior Director or Senior Manager	Inflence and make decisions	Expert	Agree	Strongly agree	Strongly agree	Agree	Agree	Agree	Strongly agree	Strongly agree	Agree	Agree	Agree	Agree	Strongly agree	Location of existing production site	Trade barriers, such as tariffs, quotas or local content requirements	Supportive policy framework with access to government subsidies or tax breaks for climate-friendly investments	Low labor costs	Geopolitical tensions and alliances
34	87	eZGPg4Y	Chemical		Chemical	Asia	Asia	10+ Years	C-Level	Inflence and make decisions	Informed, but not an expert																			Strongly agree	Agree	Agree	Strongly agree	Agree	Strongly agree	Strongly agree	Strongly agree	Agree	Strongly agree	Agree	Strongly agree	Agree	Proximity to low-cost renewable energy as a resource for green hydrogen	Supportive policy framework with access to government subsidies or tax breaks for climate-friendly investments	Skilled workforce	Proximity to markets for climate-friendly industrial products	Overall investment climate and financing conditions/capital costs
35	91	oqRg5lQ	Chemical		Chemical	Asia	Asia	3-5 Years	Vice President or Above	Inflence and make decisions	Expert																			Strongly agree	Strongly agree	Strongly agree	Strongly agree	Strongly agree	Strongly agree	Strongly agree	Strongly agree	Agree	Strongly agree	Strongly agree	Agree	Strongly agree	Overall investment climate and financing conditions/capital costs	Logistical infrastructure conditions	Trade barriers, such as tariffs, quotas or local content requirements	Proximity to low-cost renewable energy as a resource for green hydrogen	Supportive policy framework with access to government subsidies or tax breaks for climate-friendly investments
36	92	VZr6pXv	Chemical		Chemical	North America	North America	6-9 Years	Senior Director or Senior Manager	Inflence and make decisions	Expert																			Agree	Agree	Strongly agree	Agree	Agree	Strongly agree	Agree	Agree	Disagree	Agree	Agree	Agree	Strongly agree	Low labor costs	Proximity to industrial clusters in your sector or a related sector	Overall investment climate and financing conditions/capital costs	Supportive policy framework with access to government subsidies or tax breaks for climate-friendly investments	Proximity to low-cost renewable energy as a resource for green hydrogen
37	96	davYeLp	Steel		Steel	Africa	Africa	3-5 Years	Senior Director or Senior Manager	Inflence and make decisions	Expert	Strongly agree	Strongly agree	Agree	Strongly agree	Agree	Agree	Disagree	Agree	Agree	Strongly agree	Strongly agree	Agree	Agree	Proximity to low-cost renewable energy as a resource for green hydrogen	Trade barriers, such as tariffs, quotas or local content requirements	Geopolitical tensions and alliances	Skilled workforce	Low labor costs
38	97	q8MNagV	Chemical		Chemical	Asia	Asia	3-5 Years	Senior Director or Senior Manager	Inflence and make decisions	Expert																			Agree	Agree	Agree	Strongly agree	Agree	Agree	Agree	Strongly agree	Strongly agree	Agree	Strongly agree	Agree	Agree	Location of existing production site	Trade barriers, such as tariffs, quotas or local content requirements	Geopolitical tensions and alliances	Proximity to low-cost renewable energy as a resource for green hydrogen	Supportive policy framework with access to government subsidies or tax breaks for climate-friendly investments
39	98	Lzo2rAo	Steel		Steel	Africa	Africa	3-5 Years	Senior Director or Senior Manager	Inflence and make decisions	Expert	Strongly agree	Strongly agree	Agree	Agree	Agree	Agree	Agree	Strongly agree	Disagree	Agree	Disagree	Strongly agree	Strongly agree	Supportive policy framework with access to government subsidies or tax breaks for climate-friendly investments	Low labor costs	Proximity to markets for climate-friendly industrial products	Logistical infrastructure conditions	Skilled workforce
40	99	pv8Yynj	Steel		Steel	Africa	Africa	3-5 Years	Senior Director or Senior Manager	Inflence and make decisions	Expert	Strongly agree	Agree	Agree	Agree	Agree	Strongly agree	Agree	Disagree	Strongly agree	Agree	Agree	Strongly agree	Strongly agree	Supportive policy framework with access to government subsidies or tax breaks for climate-friendly investments	Geopolitical tensions and alliances	Low labor costs	Proximity to markets for climate-friendly industrial products	Overall investment climate and financing conditions/capital costs
41	101	8G05OWR	Chemical		Chemical	Africa	Africa	6-9 Years	Vice President or Above	Inflence and make decisions	Expert																			Agree	Strongly agree	Strongly agree	Agree	Agree	Strongly agree	Agree	Agree	Strongly agree	Strongly agree	Strongly agree	Agree	Strongly agree	Location of existing production site	Trade barriers, such as tariffs, quotas or local content requirements	Geopolitical tensions and alliances	Skilled workforce	Supportive policy framework with access to government subsidies or tax breaks for climate-friendly investments
42	104	O7MoZEe	Chemical		Chemical	Asia	Asia	10+ Years	Senior Director or Senior Manager	Inflence and make decisions	Expert																			Agree	Strongly agree	Strongly agree	Agree	Agree	Agree	Agree	Agree	Strongly agree	Agree	Agree	Strongly agree	Agree	Overall investment climate and financing conditions/capital costs	Geopolitical tensions and alliances	Location of existing production site	Proximity to markets for climate-friendly industrial products	Skilled workforce
43	105	YVZo4Jx	Chemical		Chemical	Europe	Europe	6-9 Years	Senior Director or Senior Manager	Inflence and make decisions	Expert																			Agree	Agree	Strongly agree	Strongly agree	Agree	Strongly agree	Agree	Agree	Strongly agree	Agree	Agree	Strongly agree	Agree	Proximity to low-cost renewable energy as a resource for green hydrogen	Proximity to markets for climate-friendly industrial products	Skilled workforce	Overall investment climate and financing conditions/capital costs	Logistical infrastructure conditions
44	110	O7MoZKX	Steel		Steel	Asia	Asia	3-5 Years	Subject Matter Expert	Inflence and make decisions	Expert	Strongly agree	Strongly agree	Disagree	Strongly agree	Strongly agree	Strongly agree	Agree	Strongly agree	Disagree	Strongly agree	Strongly agree	Agree	Strongly agree	Proximity to low-cost renewable energy as a resource for green hydrogen	Location of existing production site	Proximity to markets for climate-friendly industrial products	Overall investment climate and financing conditions/capital costs	Trade barriers, such as tariffs, quotas or local content requirements
45	115	P7Ly01n	Chemical		Chemical	Asia	Asia	6-9 Years	Senior Director or Senior Manager	Inflence and make decisions	Expert																			Agree	Agree	Agree	Strongly agree	Agree	Strongly agree	Agree	Strongly agree	Agree	Agree	Strongly agree	Strongly agree	Agree	Supportive policy framework with access to government subsidies or tax breaks for climate-friendly investments	Proximity to low-cost renewable energy as a resource for green hydrogen	Proximity to markets for climate-friendly industrial products	Proximity to low cost low natural gas as a feedstock for blue hydrogen	Proximity to industrial clusters in your sector or a related sector
46	129	mW5gaav	Steel		Steel	Asia	Asia	1-2 Years	Subject Matter Expert	Inflence and make decisions	Informed, but not an expert	Agree	Disagree	Agree	Disagree	Agree	Agree	Disagree	Agree	Disagree	Agree	Agree	Agree	Agree	Location of existing production site	Supportive policy framework with access to government subsidies or tax breaks for climate-friendly investments	Low labor costs	Geopolitical tensions and alliances	Proximity to industrial clusters in your sector or a related sector
47	131	7mZnzbz	Chemical		Chemical	Asia	Asia	6-9 Years	C-Level	Inflence and make decisions	Expert																			Strongly agree	Strongly agree	Strongly agree	Strongly agree	Strongly agree	Strongly agree	Strongly agree	Strongly agree	Agree	Strongly agree	Strongly agree	Strongly agree	Strongly agree	Proximity to low-cost renewable energy as a resource for green hydrogen	Supportive policy framework with access to government subsidies or tax breaks for climate-friendly investments	Proximity to industrial clusters in your sector or a related sector	Proximity to low cost low natural gas as a feedstock for blue hydrogen	Trade barriers, such as tariffs, quotas or local content requirements
48	135	6n1pXXl	Steel		Steel	Asia	Asia	1-2 Years	C-Level	Influence, but don't make decisions	Informed, but not an expert	Disagree	Agree	I don't know	Strongly agree	Disagree	Agree	Agree	Agree	I don't know	Agree	Agree	Agree	I don't know	Location of existing production site	Supportive policy framework with access to government subsidies or tax breaks for climate-friendly investments	Skilled workforce	Overall investment climate and financing conditions/capital costs	Proximity to low cost low natural gas as a feedstock for blue hydrogen
49	138	BKv2NNr	Financial Services (including Banking, Capital Markets, Investment Management, and Insurance)	Steel	Steel	Asia	Asia	1-2 Years	Senior Director or Senior Manager	Inflence and make decisions	Informed, but not an expert	Agree	Agree	Agree	Strongly agree	Agree	Strongly agree	Agree	Agree	Agree	Agree	Strongly agree	Agree	Agree	Proximity to low-cost renewable energy as a resource for green hydrogen	Location of existing production site	Supportive policy framework with access to government subsidies or tax breaks for climate-friendly investments	Proximity to markets for climate-friendly industrial products	Overall investment climate and financing conditions/capital costs
50	143	KX5yJKx	Steel		Steel	Asia	Asia	6-9 Years	Senior Director or Senior Manager	Inflence and make decisions	Expert	Strongly agree	Agree	Strongly agree	Strongly agree	Strongly agree	Strongly agree	Strongly agree	Strongly agree	Strongly agree	Strongly agree	Strongly agree	Strongly agree	Strongly agree	Geopolitical tensions and alliances	Location of existing production site	Skilled workforce	Proximity to markets for climate-friendly industrial products	Overall investment climate and financing conditions/capital costs
51	144	oqRg5QA	Chemical		Chemical	Asia	Asia	1-2 Years	Subject Matter Expert	Inflence and make decisions	Expert																			Strongly agree	Strongly agree	Strongly agree	Strongly agree	Agree	Strongly agree	Strongly agree	Strongly agree	Strongly agree	Strongly agree	Strongly agree	Strongly agree	Strongly agree	Supportive policy framework with access to government subsidies or tax breaks for climate-friendly investments	Overall investment climate and financing conditions/capital costs	Logistical infrastructure conditions	Low labor costs	Skilled workforce
52	151	5oKe4Pp	Steel		Steel	Asia	Asia	10+ Years	Senior Director or Senior Manager	Inflence and make decisions	Expert	Strongly agree	Strongly agree	Agree	Strongly agree	Agree	Strongly agree	Agree	Strongly agree	Agree	Strongly agree	Strongly agree	Strongly agree	Strongly agree	Proximity to markets for climate-friendly industrial products	Low labor costs	Supportive policy framework with access to government subsidies or tax breaks for climate-friendly investments	Proximity to low cost low natural gas as a feedstock for blue hydrogen	Trade barriers, such as tariffs, quotas or local content requirements
53	152	MORYKg4	Steel		Steel	Asia	Asia	3-5 Years	Subject Matter Expert	Inflence and make decisions	Expert	Agree	Agree	Strongly agree	Agree	Disagree	Strongly agree	Agree	Agree	I don't know	Agree	Disagree	Agree	Agree	Proximity to low-cost renewable energy as a resource for green hydrogen	Supportive policy framework with access to government subsidies or tax breaks for climate-friendly investments	Proximity to markets for climate-friendly industrial products	Low labor costs	Location of existing production site
54	157	Lzo2rdj	Steel		Steel	North America	North America	6-9 Years	Subject Matter Expert	Inflence and make decisions	Expert	Strongly agree	Strongly agree	Agree	Agree	Agree	Agree	Strongly agree	Agree	Strongly agree	Strongly agree	Strongly agree	Agree	Agree	Location of existing production site	Overall investment climate and financing conditions/capital costs	Proximity to markets for climate-friendly industrial products	Proximity to industrial clusters in your sector or a related sector	Trade barriers, such as tariffs, quotas or local content requirements
55	165	zv128RL	Chemical		Chemical	Latin America	Latin America	6-9 Years	Senior Director or Senior Manager	Inflence and make decisions	Expert																			Agree	Agree	Strongly agree	Strongly agree	Agree	Agree	Strongly agree	Strongly agree	Disagree	Strongly agree	Agree	Agree	Strongly agree	Proximity to low cost low natural gas as a feedstock for blue hydrogen	Proximity to low-cost renewable energy as a resource for green hydrogen	Trade barriers, such as tariffs, quotas or local content requirements	Proximity to markets for climate-friendly industrial products	Overall investment climate and financing conditions/capital costs
56	167	Zl0VXMr	Financial Services (including Banking, Capital Markets, Investment Management, and Insurance)	Steel	Steel	Asia	Asia	6-9 Years	Senior Director or Senior Manager	Inflence and make decisions	Expert	Strongly disagree	Agree	Strongly disagree	Strongly disagree	Strongly disagree	Strongly agree	Agree	Strongly agree	Agree	Strongly agree	Agree	Strongly agree	Strongly agree	Proximity to low-cost renewable energy as a resource for green hydrogen	Supportive policy framework with access to government subsidies or tax breaks for climate-friendly investments	Overall investment climate and financing conditions/capital costs	Proximity to low cost low natural gas as a feedstock for blue hydrogen	Skilled workforce
57	168	W7K6M8K	Steel		Steel	Latin America	Latin America	6-9 Years	Senior Director or Senior Manager	Inflence and make decisions	Expert	Agree	Strongly agree	Strongly agree	Strongly agree	Agree	Agree	Agree	Agree	Strongly agree	Strongly agree	Strongly agree	Strongly agree	Agree	Supportive policy framework with access to government subsidies or tax breaks for climate-friendly investments	Proximity to low-cost renewable energy as a resource for green hydrogen	Skilled workforce	Location of existing production site	Trade barriers, such as tariffs, quotas or local content requirements
58	180	MORYZB6	Financial Services (including Banking, Capital Markets, Investment Management, and Insurance)	Steel	Steel	Asia	Asia	3-5 Years	Vice President or Above	Inflence and make decisions	Expert	Agree	Strongly agree	Agree	Agree	Agree	Agree	Agree	Agree	Strongly agree	Strongly agree	Agree	Agree	Agree	Location of existing production site	Supportive policy framework with access to government subsidies or tax breaks for climate-friendly investments	Skilled workforce	Proximity to industrial clusters in your sector or a related sector	Logistical infrastructure conditions
59	182	J47vrpA	Financial Services (including Banking, Capital Markets, Investment Management, and Insurance)	Steel	Steel	Asia	Asia	6-9 Years	Senior Director or Senior Manager	Inflence and make decisions	Expert	Disagree	Agree	Agree	Strongly agree	Strongly agree	Strongly agree	Agree	Strongly agree	Disagree	Agree	Agree	Disagree	Agree	Proximity to low-cost renewable energy as a resource for green hydrogen	Geopolitical tensions and alliances	Skilled workforce	Proximity to industrial clusters in your sector or a related sector	Overall investment climate and financing conditions/capital costs
60	183	KX5yK6z	Financial Services (including Banking, Capital Markets, Investment Management, and Insurance)	Steel	Steel	Asia	Asia	3-5 Years	Senior Director or Senior Manager	Inflence and make decisions	Expert	Strongly agree	Agree	Agree	Disagree	Strongly agree	Agree	Agree	Agree	Disagree	Agree	Agree	Strongly agree	Agree	Proximity to low-cost renewable energy as a resource for green hydrogen	Supportive policy framework with access to government subsidies or tax breaks for climate-friendly investments	Skilled workforce	Overall investment climate and financing conditions/capital costs	Proximity to industrial clusters in your sector or a related sector
61	184	6n1pxbv	Financial Services (including Banking, Capital Markets, Investment Management, and Insurance)	Chemical	Chemical	North America	Asia	6-9 Years	Senior Director or Senior Manager	Inflence and make decisions	Expert																			Agree	Agree	Agree	Agree	Agree	Agree	Agree	Agree	Agree	Agree	Agree	Agree	Agree	Proximity to low-cost renewable energy as a resource for green hydrogen	Proximity to markets for climate-friendly industrial products	Overall investment climate and financing conditions/capital costs	Proximity to industrial clusters in your sector or a related sector	Supportive policy framework with access to government subsidies or tax breaks for climate-friendly investments
62	186	mW5gzyX	Financial Services (including Banking, Capital Markets, Investment Management, and Insurance)	Steel	Steel	Asia	Asia	6-9 Years	Senior Director or Senior Manager	Inflence and make decisions	Informed, but not an expert	Strongly agree	Strongly agree	Agree	Strongly agree	Agree	Agree	Agree	Strongly agree	Agree	Agree	Strongly agree	Agree	Strongly agree	Supportive policy framework with access to government subsidies or tax breaks for climate-friendly investments	Location of existing production site	Trade barriers, such as tariffs, quotas or local content requirements	Proximity to low-cost renewable energy as a resource for green hydrogen	Proximity to markets for climate-friendly industrial products
63	187	Q741gZY	Financial Services (including Banking, Capital Markets, Investment Management, and Insurance)	Steel	Steel	Asia	Asia	3-5 Years	Senior Director or Senior Manager	Inflence and make decisions	Expert	Disagree	Disagree	Strongly agree	Strongly agree	Strongly agree	Strongly agree	Strongly agree	Strongly agree	Disagree	Agree	Disagree	Agree	Agree	Proximity to low-cost renewable energy as a resource for green hydrogen	Skilled workforce	Overall investment climate and financing conditions/capital costs	Location of existing production site	Low labor costs
64	190	XV1ZBxv	Financial Services (including Banking, Capital Markets, Investment Management, and Insurance)	Steel	Steel	Asia	Asia	3-5 Years	Senior Director or Senior Manager	Inflence and make decisions	Informed, but not an expert	Agree	Agree	Strongly agree	Strongly agree	Agree	Strongly agree	Strongly agree	Strongly agree	Agree	Strongly agree	Strongly agree	I don't know	Agree	Supportive policy framework with access to government subsidies or tax breaks for climate-friendly investments	Proximity to low-cost renewable energy as a resource for green hydrogen	Proximity to low cost low natural gas as a feedstock for blue hydrogen	Location of existing production site	Trade barriers, such as tariffs, quotas or local content requirements
65	193	1nzpxld	Steel		Steel	Asia	Asia	6-9 Years	Vice President or Above	Inflence and make decisions	Informed, but not an expert	Strongly agree	Strongly agree	Agree	Agree	Strongly disagree	Agree	Disagree	Disagree	Strongly agree	Disagree	Agree	Strongly agree	Agree	Supportive policy framework with access to government subsidies or tax breaks for climate-friendly investments	Overall investment climate and financing conditions/capital costs	Proximity to low-cost renewable energy as a resource for green hydrogen	Proximity to markets for climate-friendly industrial products	Proximity to low cost low natural gas as a feedstock for blue hydrogen
66	203	Nj850nE	Chemical		Chemical	North America	Latin America	6-9 Years	Subject Matter Expert	Influence, but don't make decisions	Expert																			Strongly agree	Agree	Strongly agree	Disagree	Strongly agree	Strongly agree	Agree	Strongly agree	Agree	Strongly agree	Agree	Agree	Agree	Proximity to low-cost renewable energy as a resource for green hydrogen	Location of existing production site	Trade barriers, such as tariffs, quotas or local content requirements	Proximity to industrial clusters in your sector or a related sector	Overall investment climate and financing conditions/capital costs
67	206	4lrvx0e	Chemical		Chemical	Latin America	Latin America	3-5 Years	Senior Director or Senior Manager	Inflence and make decisions	Expert																			Strongly agree	Agree	Strongly agree	Disagree	Agree	Agree	Strongly agree	Strongly agree	Disagree	Agree	Strongly agree	Agree	Agree	Geopolitical tensions and alliances	Supportive policy framework with access to government subsidies or tax breaks for climate-friendly investments	Proximity to low-cost renewable energy as a resource for green hydrogen	Skilled workforce	Proximity to markets for climate-friendly industrial products
68	207	zv12bBx	Chemical		Chemical	Latin America	Latin America	3-5 Years	Senior Director or Senior Manager	Inflence and make decisions	Expert																			Strongly agree	Agree	Agree	Strongly agree	Agree	Strongly agree	Agree	Strongly agree	Disagree	Agree	Strongly agree	Agree	Agree	Geopolitical tensions and alliances	Supportive policy framework with access to government subsidies or tax breaks for climate-friendly investments	Trade barriers, such as tariffs, quotas or local content requirements	Skilled workforce	Proximity to markets for climate-friendly industrial products
69	208	O7MolgX	Chemical		Chemical	Latin America	Latin America	3-5 Years	Senior Director or Senior Manager	Inflence and make decisions	Expert																			Strongly agree	Agree	Disagree	Agree	Strongly agree	Strongly agree	Strongly agree	Agree	Disagree	Agree	Strongly agree	Agree	Agree	Supportive policy framework with access to government subsidies or tax breaks for climate-friendly investments	Trade barriers, such as tariffs, quotas or local content requirements	Geopolitical tensions and alliances	Proximity to low-cost renewable energy as a resource for green hydrogen	Skilled workforce
70	209	1nzpxKo	Chemical		Chemical	Latin America	Latin America	6-9 Years	Vice President or Above	Inflence and make decisions	Expert																			Strongly agree	Disagree	Agree	Agree	Strongly agree	Agree	Strongly agree	Disagree	Strongly agree	Disagree	Strongly agree	Disagree	Strongly agree	Proximity to low-cost renewable energy as a resource for green hydrogen	Location of existing production site	Trade barriers, such as tariffs, quotas or local content requirements	Supportive policy framework with access to government subsidies or tax breaks for climate-friendly investments	Proximity to industrial clusters in your sector or a related sector
71	211	rMLK1EK	Chemical		Chemical	Latin America	Latin America	6-9 Years	Vice President or Above	Inflence and make decisions	Expert																			Strongly agree	Disagree	Agree	Disagree	Strongly agree	Disagree	Agree	Strongly disagree	Agree	Disagree	Agree	Strongly agree	Agree	Location of existing production site	Proximity to low-cost renewable energy as a resource for green hydrogen	Supportive policy framework with access to government subsidies or tax breaks for climate-friendly investments	Geopolitical tensions and alliances	Trade barriers, such as tariffs, quotas or local content requirements
72	212	gGAy6gq	Financial Services (including Banking, Capital Markets, Investment Management, and Insurance)	Steel	Steel	Latin America	Latin America	10+ Years	C-Level	Inflence and make decisions	Expert	Disagree	Strongly disagree	Disagree	Agree	Strongly agree	Agree	Strongly disagree	Agree	Agree	Agree	Strongly agree	Disagree	Agree	Proximity to low-cost renewable energy as a resource for green hydrogen	Proximity to markets for climate-friendly industrial products	Overall investment climate and financing conditions/capital costs	Logistical infrastructure conditions	Proximity to low cost low natural gas as a feedstock for blue hydrogen
73	213	Nj850eE	Chemical		Chemical	Oceania-Pacific	Oceania-Pacific	6-9 Years	Senior Director or Senior Manager	Inflence and make decisions	Expert																			Strongly agree	Agree	Agree	Strongly agree	Agree	Agree	Strongly agree	Strongly agree	Agree	Strongly agree	Strongly agree	Agree	Strongly agree	Supportive policy framework with access to government subsidies or tax breaks for climate-friendly investments	Proximity to markets for climate-friendly industrial products	Proximity to industrial clusters in your sector or a related sector	Logistical infrastructure conditions	Proximity to low-cost renewable energy as a resource for green hydrogen
74	214	aAaQBKB	Chemical		Chemical	Latin America	Latin America	6-9 Years	Vice President or Above	Inflence and make decisions	Expert																			Agree	Agree	Agree	Strongly agree	Strongly agree	Agree	Strongly agree	Strongly agree	Strongly agree	Agree	Strongly agree	Agree	Agree	Location of existing production site	Proximity to low-cost renewable energy as a resource for green hydrogen	Low labor costs	Trade barriers, such as tariffs, quotas or local content requirements	Geopolitical tensions and alliances
75	215	xvrZNjQ	Steel		Steel	Latin America	Latin America	6-9 Years	Senior Director or Senior Manager	Inflence and make decisions	Expert	Agree	Strongly agree	Strongly agree	Agree	Strongly agree	Strongly agree	Strongly agree	Agree	Strongly agree	Agree	Strongly agree	Strongly agree	Agree	Location of existing production site	Supportive policy framework with access to government subsidies or tax breaks for climate-friendly investments	Trade barriers, such as tariffs, quotas or local content requirements	Geopolitical tensions and alliances	Proximity to low-cost renewable energy as a resource for green hydrogen
76	217	Ar96mpN	Chemical		Chemical	Oceania-Pacific	Oceania-Pacific	6-9 Years	Senior Director or Senior Manager	Inflence and make decisions	Expert																			Agree	Strongly agree	Strongly agree	Agree	Strongly agree	Agree	Strongly agree	Strongly agree	Agree	Strongly agree	Strongly agree	Agree	Agree	Geopolitical tensions and alliances	Overall investment climate and financing conditions/capital costs	Trade barriers, such as tariffs, quotas or local content requirements	Supportive policy framework with access to government subsidies or tax breaks for climate-friendly investments	Logistical infrastructure conditions
77	218	n2onOvg	Chemical		Chemical	Oceania-Pacific	Oceania-Pacific	6-9 Years	Senior Director or Senior Manager	Inflence and make decisions	Informed, but not an expert																			Strongly agree	Agree	Strongly agree	Agree	Strongly agree	Agree	Strongly agree	Agree	Strongly agree	Agree	Strongly agree	Agree	Strongly agree	Supportive policy framework with access to government subsidies or tax breaks for climate-friendly investments	Skilled workforce	Proximity to industrial clusters in your sector or a related sector	Low labor costs	Geopolitical tensions and alliances
78	223	6n1pxel	Chemical		Chemical	Oceania-Pacific	Oceania-Pacific	6-9 Years	Senior Director or Senior Manager	Inflence and make decisions	Expert																			Agree	Agree	Strongly agree	Agree	Agree	Agree	Agree	Disagree	Agree	Strongly agree	Agree	Disagree	Agree	Trade barriers, such as tariffs, quotas or local content requirements	Geopolitical tensions and alliances	Supportive policy framework with access to government subsidies or tax breaks for climate-friendly investments	Skilled workforce	Proximity to markets for climate-friendly industrial products
79	225	Lzo21Lp	Steel		Steel	Oceania-Pacific	Oceania-Pacific	10+ Years	Vice President or Above	Inflence and make decisions	Expert	Agree	Agree	Strongly agree	Strongly agree	Agree	Agree	Agree	Strongly agree	Strongly agree	Agree	Agree	Strongly agree	Strongly agree	Proximity to low-cost renewable energy as a resource for green hydrogen	Supportive policy framework with access to government subsidies or tax breaks for climate-friendly investments	Location of existing production site	Low labor costs	Proximity to industrial clusters in your sector or a related sector
80	226	XV1ZBeO	Steel		Steel	Oceania-Pacific	Oceania-Pacific	10+ Years	Senior Director or Senior Manager	Inflence and make decisions	Expert	Agree	Strongly agree	Strongly agree	Agree	Agree	Agree	Strongly agree	Agree	Agree	Strongly agree	Agree	Agree	Strongly agree	Proximity to low-cost renewable energy as a resource for green hydrogen	Geopolitical tensions and alliances	Location of existing production site	Low labor costs	Proximity to industrial clusters in your sector or a related sector
81	227	Nj850Kg	Steel		Steel	Oceania-Pacific	Oceania-Pacific	6-9 Years	Senior Director or Senior Manager	Inflence and make decisions	Expert	Strongly agree	Agree	Agree	Agree	Strongly agree	Strongly agree	Agree	Strongly agree	Strongly agree	Agree	Agree	Strongly agree	Strongly agree	Proximity to low-cost renewable energy as a resource for green hydrogen	Geopolitical tensions and alliances	Location of existing production site	Low labor costs	Trade barriers, such as tariffs, quotas or local content requirements
82	228	1nzpxbP	Chemical		Chemical	Oceania-Pacific	Oceania-Pacific	6-9 Years	Senior Director or Senior Manager	Inflence and make decisions	Expert																			Strongly agree	Agree	Agree	Strongly agree	Agree	Strongly agree	Agree	Agree	Agree	Agree	Strongly agree	Agree	Agree	Proximity to low-cost renewable energy as a resource for green hydrogen	Supportive policy framework with access to government subsidies or tax breaks for climate-friendly investments	Geopolitical tensions and alliances	Trade barriers, such as tariffs, quotas or local content requirements	Proximity to markets for climate-friendly industrial products
83	229	KX5yKd4	Steel		Steel	Oceania-Pacific	Oceania-Pacific	6-9 Years	Senior Director or Senior Manager	Inflence and make decisions	Expert	Strongly agree	Strongly agree	Strongly agree	Strongly agree	Agree	Agree	Strongly agree	Strongly agree	Agree	Strongly agree	Strongly agree	Strongly agree	Strongly agree	Proximity to low-cost renewable energy as a resource for green hydrogen	Supportive policy framework with access to government subsidies or tax breaks for climate-friendly investments	Location of existing production site	Low labor costs	Geopolitical tensions and alliances
84	230	KX5yKdg	Chemical		Chemical	Oceania-Pacific	Oceania-Pacific	6-9 Years	Senior Director or Senior Manager	Inflence and make decisions	Informed, but not an expert																			Agree	Agree	Strongly agree	Agree	Agree	Agree	Strongly agree	Agree	Strongly agree	Agree	Agree	Agree	Strongly agree	Trade barriers, such as tariffs, quotas or local content requirements	Proximity to markets for climate-friendly industrial products	Logistical infrastructure conditions	Skilled workforce	Proximity to low-cost renewable energy as a resource for green hydrogen
85	231	1nzpxbz	Chemical		Chemical	Oceania-Pacific	Oceania-Pacific	10+ Years	Senior Director or Senior Manager	Inflence and make decisions	Expert																			Agree	Strongly agree	Strongly agree	Agree	Strongly agree	Agree	Strongly agree	Strongly agree	Agree	Agree	Strongly agree	Agree	Strongly agree	Supportive policy framework with access to government subsidies or tax breaks for climate-friendly investments	Proximity to industrial clusters in your sector or a related sector	Proximity to low cost low natural gas as a feedstock for blue hydrogen	Low labor costs	Geopolitical tensions and alliances
86	235	G8B2zrV	Chemical		Chemical	Oceania-Pacific	Oceania-Pacific	3-5 Years	C-Level	Inflence and make decisions	Expert																			Agree	Agree	Agree	Agree	Agree	Agree	Agree	Disagree	Agree	Agree	Agree	Agree	Agree	Proximity to low-cost renewable energy as a resource for green hydrogen	Location of existing production site	Geopolitical tensions and alliances	Trade barriers, such as tariffs, quotas or local content requirements	Supportive policy framework with access to government subsidies or tax breaks for climate-friendly investments
87	237	q8MNKoR	Chemical		Chemical	Oceania-Pacific	Oceania-Pacific	6-9 Years	Vice President or Above	Inflence and make decisions	Informed, but not an expert																			Strongly agree	Agree	Agree	Strongly agree	Strongly agree	Agree	Agree	Agree	Strongly agree	Strongly agree	Strongly agree	Strongly agree	Agree	Proximity to low-cost renewable energy as a resource for green hydrogen	Supportive policy framework with access to government subsidies or tax breaks for climate-friendly investments	Low labor costs	Skilled workforce	Proximity to low cost low natural gas as a feedstock for blue hydrogen
88	238	1nzpxez	Chemical		Chemical	Latin America	Latin America	10+ Years	Vice President or Above	Influence, but don't make decisions	Informed, but not an expert																			Agree	Disagree	Strongly disagree	Agree	Strongly agree	Disagree	Strongly disagree	Strongly agree	Disagree	Disagree	Agree	Strongly disagree	Agree	Proximity to low-cost renewable energy as a resource for green hydrogen	Supportive policy framework with access to government subsidies or tax breaks for climate-friendly investments	Low labor costs	Proximity to markets for climate-friendly industrial products	Overall investment climate and financing conditions/capital costs
89	241	0nXBxlz	Steel		Steel	Latin America	Latin America	6-9 Years	Senior Director or Senior Manager	Inflence and make decisions	Informed, but not an expert	Strongly agree	Disagree	Strongly disagree	Disagree	Agree	Disagree	Strongly disagree	Disagree	Strongly agree	Disagree	Agree	Disagree	Disagree	Location of existing production site	Supportive policy framework with access to government subsidies or tax breaks for climate-friendly investments	Trade barriers, such as tariffs, quotas or local content requirements	Proximity to markets for climate-friendly industrial products	Proximity to industrial clusters in your sector or a related sector
90	242	pv8Yrox	Chemical		Chemical	Oceania-Pacific	Oceania-Pacific	3-5 Years	C-Level	Inflence and make decisions	Expert																			Agree	Agree	Agree	Strongly agree	Strongly agree	Agree	Agree	Strongly agree	Agree	Agree	Agree	Agree	Agree	Geopolitical tensions and alliances	Low labor costs	Skilled workforce	Overall investment climate and financing conditions/capital costs	Logistical infrastructure conditions
91	243	Zl0VyBe	Steel		Steel	Latin America	Latin America	3-5 Years	Senior Director or Senior Manager	Influence, but don't make decisions	Informed, but not an expert	Agree	Strongly disagree	Disagree	Strongly agree	Strongly agree	Disagree	Agree	Agree	Agree	Strongly disagree	Disagree	Agree	Agree	Proximity to low-cost renewable energy as a resource for green hydrogen	Low labor costs	Trade barriers, such as tariffs, quotas or local content requirements	Supportive policy framework with access to government subsidies or tax breaks for climate-friendly investments	Proximity to markets for climate-friendly industrial products
92	244	rMLK1oG	Steel		Steel	Latin America	Latin America	6-9 Years	Senior Director or Senior Manager	Influence, but don't make decisions	Informed, but not an expert	Disagree	Strongly agree	Disagree	Agree	Strongly disagree	Disagree	Strongly agree	Disagree	Agree	Strongly agree	Disagree	Disagree	Strongly agree	Proximity to low-cost renewable energy as a resource for green hydrogen	Supportive policy framework with access to government subsidies or tax breaks for climate-friendly investments	Skilled workforce	Proximity to markets for climate-friendly industrial products	Proximity to industrial clusters in your sector or a related sector
93	246	aAaQBYv	Chemical		Chemical	Latin America	Latin America	10+ Years	Vice President or Above	Inflence and make decisions	Informed, but not an expert																			Strongly agree	Disagree	Strongly disagree	Strongly agree	Disagree	Strongly disagree	Agree	Strongly agree	Disagree	Strongly disagree	Disagree	Strongly agree	Disagree	Proximity to low-cost renewable energy as a resource for green hydrogen	Supportive policy framework with access to government subsidies or tax breaks for climate-friendly investments	Low labor costs	Geopolitical tensions and alliances	Proximity to industrial clusters in your sector or a related sector
94	247	8G05xLN	Financial Services (including Banking, Capital Markets, Investment Management, and Insurance)	Steel	Steel	Latin America	Latin America	6-9 Years	Senior Director or Senior Manager	Inflence and make decisions	Informed, but not an expert	Agree	Agree	Strongly agree	Strongly agree	Disagree	Strongly agree	Agree	Disagree	I don't know	Agree	Disagree	Strongly agree	Agree	Proximity to low-cost renewable energy as a resource for green hydrogen	Location of existing production site	Low labor costs	Logistical infrastructure conditions	Overall investment climate and financing conditions/capital costs
95	249	8G05Ky7	Financial Services (including Banking, Capital Markets, Investment Management, and Insurance)	Steel	Steel	Oceania-Pacific	Oceania-Pacific	6-9 Years	C-Level	Inflence and make decisions	Expert	Agree	Strongly agree	Strongly agree	Agree	Agree	Strongly agree	Agree	Agree	Strongly agree	Agree	Agree	Strongly agree	Agree	Proximity to low-cost renewable energy as a resource for green hydrogen	Supportive policy framework with access to government subsidies or tax breaks for climate-friendly investments	Proximity to markets for climate-friendly industrial products	Trade barriers, such as tariffs, quotas or local content requirements	Proximity to industrial clusters in your sector or a related sector
96	250	XV1Z5dO	Financial Services (including Banking, Capital Markets, Investment Management, and Insurance)	Steel	Steel	Oceania-Pacific	Oceania-Pacific	6-9 Years	C-Level	Inflence and make decisions	Expert	Agree	Agree	Strongly agree	Strongly agree	Agree	Strongly agree	Agree	Agree	Strongly agree	Strongly agree	Agree	Agree	Strongly agree	Proximity to low-cost renewable energy as a resource for green hydrogen	Trade barriers, such as tariffs, quotas or local content requirements	Supportive policy framework with access to government subsidies or tax breaks for climate-friendly investments	Proximity to industrial clusters in your sector or a related sector	Logistical infrastructure conditions
97	252	davY5VE	Financial Services (including Banking, Capital Markets, Investment Management, and Insurance)	Steel	Steel	Oceania-Pacific	Oceania-Pacific	6-9 Years	C-Level	Inflence and make decisions	Expert	Agree	Strongly agree	Strongly agree	Agree	Strongly agree	Strongly agree	Agree	Strongly agree	Agree	Strongly agree	Strongly agree	Agree	Strongly agree	Proximity to low-cost renewable energy as a resource for green hydrogen	Supportive policy framework with access to government subsidies or tax breaks for climate-friendly investments	Low labor costs	Trade barriers, such as tariffs, quotas or local content requirements	Proximity to markets for climate-friendly industrial products
98	255	lv75Q4K	Financial Services (including Banking, Capital Markets, Investment Management, and Insurance)	Steel	Steel	Oceania-Pacific	Oceania-Pacific	6-9 Years	C-Level	Inflence and make decisions	Expert	Agree	Strongly agree	Strongly agree	Agree	Agree	Strongly agree	Agree	Strongly agree	Agree	Disagree	Agree	Agree	Agree	Location of existing production site	Geopolitical tensions and alliances	Proximity to markets for climate-friendly industrial products	Trade barriers, such as tariffs, quotas or local content requirements	Supportive policy framework with access to government subsidies or tax breaks for climate-friendly investments
99	256	yrKxQXe	Financial Services (including Banking, Capital Markets, Investment Management, and Insurance)	Steel	Steel	Oceania-Pacific	Oceania-Pacific	6-9 Years	Vice President or Above	Inflence and make decisions	Expert	Agree	Strongly agree	Agree	Disagree	Agree	Strongly agree	Agree	Agree	Strongly agree	Agree	Agree	Agree	Strongly agree	Proximity to low-cost renewable energy as a resource for green hydrogen	Supportive policy framework with access to government subsidies or tax breaks for climate-friendly investments	Trade barriers, such as tariffs, quotas or local content requirements	Proximity to markets for climate-friendly industrial products	Proximity to industrial clusters in your sector or a related sector
100	259	mW5gQWK	Chemical		Chemical	Oceania-Pacific	Oceania-Pacific	3-5 Years	Vice President or Above	Inflence and make decisions	Expert																			Strongly agree	Agree	Strongly agree	Agree	Strongly agree	Strongly agree	Agree	Strongly agree	Agree	Strongly agree	Agree	Agree	Strongly agree	Location of existing production site	Proximity to low-cost renewable energy as a resource for green hydrogen	Trade barriers, such as tariffs, quotas or local content requirements	Supportive policy framework with access to government subsidies or tax breaks for climate-friendly investments	Proximity to industrial clusters in your sector or a related sector
101	260	Q741Q71	Financial Services (including Banking, Capital Markets, Investment Management, and Insurance)	Steel	Steel	Oceania-Pacific	Oceania-Pacific	3-5 Years	Vice President or Above	Inflence and make decisions	Expert	Agree	Strongly agree	Strongly agree	Strongly agree	Agree	Strongly agree	Agree	Strongly agree	Strongly agree	Agree	Agree	Strongly agree	Agree	Proximity to low-cost renewable energy as a resource for green hydrogen	Supportive policy framework with access to government subsidies or tax breaks for climate-friendly investments	Proximity to markets for climate-friendly industrial products	Overall investment climate and financing conditions/capital costs	Trade barriers, such as tariffs, quotas or local content requirements
102	261	Lzo2Qzp	Financial Services (including Banking, Capital Markets, Investment Management, and Insurance)	Steel	Steel	Oceania-Pacific	Oceania-Pacific	6-9 Years	Vice President or Above	Inflence and make decisions	Expert	Agree	Strongly agree	Agree	Strongly agree	Agree	Strongly agree	Agree	Strongly agree	Agree	Agree	Strongly agree	Strongly agree	Agree	Geopolitical tensions and alliances	Location of existing production site	Low labor costs	Proximity to low-cost renewable energy as a resource for green hydrogen	Supportive policy framework with access to government subsidies or tax breaks for climate-friendly investments
103	262	4lrvzlW	Financial Services (including Banking, Capital Markets, Investment Management, and Insurance)	Steel	Steel	Oceania-Pacific	Oceania-Pacific	6-9 Years	Vice President or Above	Inflence and make decisions	Expert	Agree	Agree	Strongly agree	Strongly agree	Agree	Strongly agree	Agree	Strongly agree	Agree	Agree	Strongly agree	Agree	Agree	Proximity to low-cost renewable energy as a resource for green hydrogen	Geopolitical tensions and alliances	Trade barriers, such as tariffs, quotas or local content requirements	Supportive policy framework with access to government subsidies or tax breaks for climate-friendly investments	Proximity to markets for climate-friendly industrial products
104	263	ErAmQr6	Financial Services (including Banking, Capital Markets, Investment Management, and Insurance)	Steel	Steel	Oceania-Pacific	Oceania-Pacific	6-9 Years	C-Level	Inflence and make decisions	Expert	Strongly agree	Strongly agree	Agree	Agree	Strongly agree	Strongly agree	Agree	Strongly agree	Agree	Strongly agree	Strongly agree	Agree	Strongly agree	Trade barriers, such as tariffs, quotas or local content requirements	Supportive policy framework with access to government subsidies or tax breaks for climate-friendly investments	Low labor costs	Skilled workforce	Proximity to industrial clusters in your sector or a related sector
105	264	W7K6579	Financial Services (including Banking, Capital Markets, Investment Management, and Insurance)	Steel	Steel	Oceania-Pacific	Oceania-Pacific	6-9 Years	C-Level	Inflence and make decisions	Expert	Agree	Strongly agree	Agree	Strongly agree	Strongly agree	Strongly agree	Agree	Strongly agree	Agree	Strongly agree	Agree	Strongly agree	Agree	Proximity to low-cost renewable energy as a resource for green hydrogen	Supportive policy framework with access to government subsidies or tax breaks for climate-friendly investments	Low labor costs	Skilled workforce	Trade barriers, such as tariffs, quotas or local content requirements
106	265	MORm8N5	Chemical		Chemical	Europe	Europe	10+ Years	Senior Director or Senior Manager	Inflence and make decisions	Expert																			Strongly agree	Agree	Agree	Agree	Strongly agree	Agree	Strongly agree	Strongly agree	Agree	Agree	Strongly agree	Agree	Strongly agree	Trade barriers, such as tariffs, quotas or local content requirements	Supportive policy framework with access to government subsidies or tax breaks for climate-friendly investments	Location of existing production site	Proximity to low-cost renewable energy as a resource for green hydrogen	Proximity to markets for climate-friendly industrial products
107	269	rMLxXzy	Steel		Steel	North America	North America	6-9 Years	Senior Director or Senior Manager	Inflence and make decisions	Expert	Agree	Agree	Disagree	Strongly agree	Agree	Disagree	Agree	Strongly agree	Agree	Agree	Disagree	Agree	Agree	Supportive policy framework with access to government subsidies or tax breaks for climate-friendly investments	Skilled workforce	Proximity to low-cost renewable energy as a resource for green hydrogen	Proximity to markets for climate-friendly industrial products	Overall investment climate and financing conditions/capital costs
108	270	O7MbLyW	Chemical		Chemical	Europe	Europe	10+ Years	Senior Director or Senior Manager	Inflence and make decisions	Expert																			Strongly agree	Agree	Strongly agree	Agree	Agree	Agree	Agree	Strongly agree	Agree	Agree	Agree	Agree	Agree	Supportive policy framework with access to government subsidies or tax breaks for climate-friendly investments	Low labor costs	Skilled workforce	Geopolitical tensions and alliances	Proximity to markets for climate-friendly industrial products
109	271	Zl0K216	Chemical		Chemical	Asia	Asia	6-9 Years	Vice President or Above	Inflence and make decisions	Expert																			Agree	Strongly agree	Disagree	Disagree	Strongly agree	Agree	Agree	Strongly agree	Strongly disagree	Disagree	Disagree	Disagree	Strongly agree	Geopolitical tensions and alliances	Trade barriers, such as tariffs, quotas or local content requirements	Location of existing production site	Skilled workforce	Proximity to low-cost renewable energy as a resource for green hydrogen
110	272	MORm8yv	Chemical		Chemical	Europe	Europe	10+ Years	Senior Director or Senior Manager	Inflence and make decisions	Expert																			Agree	Strongly agree	Strongly agree	Strongly agree	Strongly agree	Agree	Agree	Strongly agree	Agree	Agree	Agree	Strongly agree	Agree	Geopolitical tensions and alliances	Proximity to low-cost renewable energy as a resource for green hydrogen	Low labor costs	Proximity to markets for climate-friendly industrial products	Skilled workforce
111	274	4lr1gml	Chemical		Chemical	Asia	Asia	6-9 Years	Senior Director or Senior Manager	Inflence and make decisions	Expert																			Agree	Disagree	Strongly agree	Agree	Agree	Agree	Strongly agree	Disagree	Disagree	Agree	Disagree	Strongly agree	Disagree	Location of existing production site	Low labor costs	Proximity to markets for climate-friendly industrial products	Supportive policy framework with access to government subsidies or tax breaks for climate-friendly investments	Proximity to industrial clusters in your sector or a related sector
112	275	rMLxXz7	Chemical		Chemical	Europe	Europe	10+ Years	Senior Director or Senior Manager	Inflence and make decisions	Expert																			Agree	Strongly agree	Agree	Agree	Agree	Agree	Agree	Strongly agree	Strongly agree	Strongly agree	Agree	Strongly agree	Agree	Proximity to low-cost renewable energy as a resource for green hydrogen	Supportive policy framework with access to government subsidies or tax breaks for climate-friendly investments	Skilled workforce	Geopolitical tensions and alliances	Proximity to industrial clusters in your sector or a related sector
113	276	1nzJNG6	Steel		Steel	Europe	Europe	6-9 Years	Senior Director or Senior Manager	Inflence and make decisions	Expert	Strongly agree	Strongly agree	Agree	Strongly agree	Strongly agree	Agree	Strongly agree	Agree	Strongly agree	Strongly agree	Strongly agree	Strongly agree	Agree	Skilled workforce	Supportive policy framework with access to government subsidies or tax breaks for climate-friendly investments	Geopolitical tensions and alliances	Location of existing production site	Proximity to markets for climate-friendly industrial products
114	278	gGAK7M6	Chemical		Chemical	Europe	Europe	6-9 Years	Senior Director or Senior Manager	Inflence and make decisions	Expert																			Strongly agree	Strongly agree	Agree	Agree	Strongly agree	Strongly agree	Strongly agree	Agree	Agree	Agree	Strongly agree	Strongly agree	Strongly agree	Geopolitical tensions and alliances	Trade barriers, such as tariffs, quotas or local content requirements	Skilled workforce	Proximity to industrial clusters in your sector or a related sector	Proximity to low cost low natural gas as a feedstock for blue hydrogen
115	279	aAa42dz	Steel		Steel	Europe	Europe	10+ Years	Senior Director or Senior Manager	Inflence and make decisions	Expert	Strongly agree	Strongly agree	Agree	Agree	Strongly agree	Strongly agree	Strongly agree	Agree	Agree	Strongly agree	Strongly agree	Agree	Strongly agree	Proximity to low-cost renewable energy as a resource for green hydrogen	Supportive policy framework with access to government subsidies or tax breaks for climate-friendly investments	Low labor costs	Skilled workforce	Proximity to industrial clusters in your sector or a related sector
116	281	zv1EdY7	Chemical		Chemical	Europe	Europe	10+ Years	Senior Director or Senior Manager	Inflence and make decisions	Expert																			Agree	Agree	Strongly agree	Agree	Strongly agree	Agree	Strongly agree	Agree	Strongly agree	Strongly agree	Strongly agree	Agree	Agree	Supportive policy framework with access to government subsidies or tax breaks for climate-friendly investments	Skilled workforce	Geopolitical tensions and alliances	Trade barriers, such as tariffs, quotas or local content requirements	Logistical infrastructure conditions
117	282	Nj8mMJQ	Chemical		Chemical	Europe	Europe	10+ Years	Senior Director or Senior Manager	Inflence and make decisions	Informed, but not an expert																			Agree	Strongly agree	Strongly agree	Agree	Strongly agree	Agree	Strongly agree	Strongly agree	Agree	Strongly agree	Strongly agree	Agree	Agree	Low labor costs	Geopolitical tensions and alliances	Proximity to markets for climate-friendly industrial products	Trade barriers, such as tariffs, quotas or local content requirements	Proximity to industrial clusters in your sector or a related sector
118	283	98lBgzr	Chemical		Chemical	Europe	Europe	10+ Years	Senior Director or Senior Manager	Inflence and make decisions	Expert																			Agree	Strongly agree	Agree	Agree	Strongly agree	Strongly agree	Strongly agree	Agree	Strongly agree	Strongly agree	Agree	Strongly agree	Strongly agree	Trade barriers, such as tariffs, quotas or local content requirements	Geopolitical tensions and alliances	Proximity to markets for climate-friendly industrial products	Supportive policy framework with access to government subsidies or tax breaks for climate-friendly investments	Skilled workforce
119	284	1nzJNGZ	Steel		Steel	Asia	Asia	6-9 Years	Senior Director or Senior Manager	Inflence and make decisions	Expert	Disagree	Agree	Agree	Strongly agree	Disagree	Agree	Strongly agree	Strongly agree	Disagree	Disagree	Strongly disagree	Strongly agree	Agree	Geopolitical tensions and alliances	Supportive policy framework with access to government subsidies or tax breaks for climate-friendly investments	Low labor costs	Location of existing production site	Proximity to industrial clusters in your sector or a related sector
120	286	Ar9WlnZ	Chemical		Chemical	Asia	Asia	10+ Years	Senior Director or Senior Manager	Inflence and make decisions	Expert																			Agree	Strongly agree	Agree	Agree	Agree	Agree	Strongly agree	Agree	Agree	Strongly agree	Agree	Strongly agree	Strongly agree	Proximity to low-cost renewable energy as a resource for green hydrogen	Geopolitical tensions and alliances	Supportive policy framework with access to government subsidies or tax breaks for climate-friendly investments	Low labor costs	Proximity to markets for climate-friendly industrial products
121	287	R7XMzPV	Chemical		Chemical	Europe	Europe	3-5 Years	Subject Matter Expert	Influence, but don't make decisions	Informed, but not an expert																			Strongly agree	Agree	Strongly agree	Strongly agree	Agree	Agree	Agree	Agree	Strongly agree	Strongly agree	Agree	Strongly agree	Agree	Trade barriers, such as tariffs, quotas or local content requirements	Proximity to markets for climate-friendly industrial products	Location of existing production site	Geopolitical tensions and alliances	Logistical infrastructure conditions
122	288	G8BbN1p	Chemical		Chemical	Asia	Asia	10+ Years	Senior Director or Senior Manager	Inflence and make decisions	Expert																			Agree	Agree	Agree	Strongly agree	Agree	Agree	Agree	Strongly agree	Disagree	Agree	Strongly agree	Agree	Agree	Proximity to low-cost renewable energy as a resource for green hydrogen	Trade barriers, such as tariffs, quotas or local content requirements	Supportive policy framework with access to government subsidies or tax breaks for climate-friendly investments	Skilled workforce	Proximity to industrial clusters in your sector or a related sector
123	292	5oKZgG0	Steel		Steel	Asia	Asia	3-5 Years	Senior Director or Senior Manager	Inflence and make decisions	Expert	Strongly agree	Strongly agree	Disagree	Agree	Agree	Agree	Disagree	Strongly agree	Agree	Disagree	Agree	Strongly disagree	Disagree	Trade barriers, such as tariffs, quotas or local content requirements	Skilled workforce	Geopolitical tensions and alliances	Proximity to markets for climate-friendly industrial products	Logistical infrastructure conditions
124	293	VZrzKba	Steel		Steel	Asia	Asia	10+ Years	Vice President or Above	Inflence and make decisions	Expert	Agree	Strongly disagree	Strongly agree	Strongly agree	Disagree	Agree	Strongly agree	Agree	Agree	Strongly disagree	Disagree	Strongly agree	Strongly agree	Location of existing production site	Geopolitical tensions and alliances	Low labor costs	Proximity to industrial clusters in your sector or a related sector	Skilled workforce
125	294	W7KO1ov	Chemical		Chemical	Asia	Asia	6-9 Years	Vice President or Above	Inflence and make decisions	Expert																			Agree	Strongly agree	Disagree	Agree	Agree	Strongly agree	Agree	Agree	Strongly disagree	Disagree	Strongly agree	Disagree	Agree	Proximity to low-cost renewable energy as a resource for green hydrogen	Trade barriers, such as tariffs, quotas or local content requirements	Skilled workforce	Overall investment climate and financing conditions/capital costs	Proximity to markets for climate-friendly industrial products
126	295	8G0epoa	Chemical		Chemical	Europe	Europe	3-5 Years	Subject Matter Expert	Influence, but don't make decisions	Informed, but not an expert																			Agree	Strongly agree	Strongly agree	Agree	Strongly agree	Strongly agree	Agree	Strongly agree	Agree	Agree	Strongly agree	Strongly agree	Agree	Proximity to low-cost renewable energy as a resource for green hydrogen	Trade barriers, such as tariffs, quotas or local content requirements	Supportive policy framework with access to government subsidies or tax breaks for climate-friendly investments	Geopolitical tensions and alliances	Proximity to industrial clusters in your sector or a related sector
127	296	7mZ65gz	Chemical		Chemical	Europe	Europe	3-5 Years	Subject Matter Expert	Influence, but don't make decisions	Informed, but not an expert																			Strongly agree	Strongly agree	Agree	Strongly agree	Agree	Agree	Strongly agree	Agree	Strongly agree	Agree	Agree	Agree	Strongly agree	Proximity to low-cost renewable energy as a resource for green hydrogen	Trade barriers, such as tariffs, quotas or local content requirements	Supportive policy framework with access to government subsidies or tax breaks for climate-friendly investments	Skilled workforce	Overall investment climate and financing conditions/capital costs
128	297	yrKEqp9	Chemical		Chemical	Asia	Asia	6-9 Years	Senior Director or Senior Manager	Inflence and make decisions	Expert																			Agree	Strongly agree	Strongly agree	Agree	Agree	Agree	Strongly agree	Agree	Strongly agree	Agree	Agree	Agree	Strongly agree	Geopolitical tensions and alliances	Proximity to low-cost renewable energy as a resource for green hydrogen	Proximity to industrial clusters in your sector or a related sector	Supportive policy framework with access to government subsidies or tax breaks for climate-friendly investments	Trade barriers, such as tariffs, quotas or local content requirements
129	298	P7LBjN1	Steel		Steel	Europe	Europe	6-9 Years	Senior Director or Senior Manager	Inflence and make decisions	Expert	Agree	Agree	Disagree	Disagree	Agree	Agree	Strongly agree	Disagree	Agree	Strongly agree	Agree	Agree	Strongly agree	Proximity to low-cost renewable energy as a resource for green hydrogen	Supportive policy framework with access to government subsidies or tax breaks for climate-friendly investments	Skilled workforce	Low labor costs	Trade barriers, such as tariffs, quotas or local content requirements
130	299	5oKZ7lp	Chemical		Chemical	Europe	Europe	6-9 Years	Vice President or Above	Inflence and make decisions	Expert																			Agree	Strongly agree	Strongly agree	Agree	Strongly agree	Agree	Strongly agree	Agree	Strongly agree	Strongly agree	Strongly agree	Agree	Strongly agree	Proximity to low-cost renewable energy as a resource for green hydrogen	Supportive policy framework with access to government subsidies or tax breaks for climate-friendly investments	Proximity to markets for climate-friendly industrial products	Logistical infrastructure conditions	Proximity to low cost low natural gas as a feedstock for blue hydrogen
131	301	q8MGEBV	Steel		Steel	Europe	Europe	6-9 Years	Senior Director or Senior Manager	Inflence and make decisions	Expert	Disagree	Agree	Agree	Agree	Agree	Agree	Strongly agree	Agree	Strongly agree	Agree	Disagree	Strongly agree	Agree	Proximity to low-cost renewable energy as a resource for green hydrogen	Supportive policy framework with access to government subsidies or tax breaks for climate-friendly investments	Low labor costs	Trade barriers, such as tariffs, quotas or local content requirements	Geopolitical tensions and alliances
132	305	8G0e7NR	Chemical		Chemical	Europe	Europe	6-9 Years	Senior Director or Senior Manager	Inflence and make decisions	Expert																			Strongly agree	Agree	Agree	Strongly agree	Agree	Strongly agree	Agree	Strongly agree	Strongly agree	Agree	Agree	Strongly agree	Strongly agree	Proximity to low-cost renewable energy as a resource for green hydrogen	Supportive policy framework with access to government subsidies or tax breaks for climate-friendly investments	Low labor costs	Skilled workforce	Proximity to industrial clusters in your sector or a related sector
133	306	MORmEld	Chemical		Chemical	Europe	Europe	6-9 Years	Senior Director or Senior Manager	Inflence and make decisions	Expert																			Strongly agree	Agree	Strongly agree	Strongly agree	Agree	Strongly agree	Agree	Strongly agree	Strongly agree	Agree	Agree	Strongly agree	Strongly agree	Supportive policy framework with access to government subsidies or tax breaks for climate-friendly investments	Geopolitical tensions and alliances	Skilled workforce	Proximity to industrial clusters in your sector or a related sector	Proximity to low-cost renewable energy as a resource for green hydrogen
134	307	jvy01b9	Chemical		Chemical	Europe	Europe	6-9 Years	Vice President or Above	Inflence and make decisions	Expert																			Strongly agree	Agree	Agree	Agree	Strongly agree	Strongly agree	Agree	Strongly agree	Strongly agree	Agree	Agree	Strongly agree	Strongly agree	Proximity to low-cost renewable energy as a resource for green hydrogen	Supportive policy framework with access to government subsidies or tax breaks for climate-friendly investments	Proximity to markets for climate-friendly industrial products	Trade barriers, such as tariffs, quotas or local content requirements	Overall investment climate and financing conditions/capital costs
135	308	XV1Jv8K	Steel		Steel	Europe	Europe	6-9 Years	Vice President or Above	Inflence and make decisions	Expert	Agree	Strongly agree	Strongly disagree	Strongly agree	Agree	Strongly agree	Agree	Agree	Disagree	Disagree	Agree	Strongly agree	Agree	Proximity to low-cost renewable energy as a resource for green hydrogen	Trade barriers, such as tariffs, quotas or local content requirements	Low labor costs	Proximity to industrial clusters in your sector or a related sector	Skilled workforce
136	309	O7MbBge	Steel		Steel	Europe	Europe	10+ Years	Senior Director or Senior Manager	Inflence and make decisions	Expert	Strongly agree	Agree	Strongly disagree	Agree	Strongly agree	Strongly agree	Agree	Agree	Strongly agree	Agree	Agree	Strongly agree	Agree	Geopolitical tensions and alliances	Trade barriers, such as tariffs, quotas or local content requirements	Proximity to markets for climate-friendly industrial products	Proximity to industrial clusters in your sector or a related sector	Overall investment climate and financing conditions/capital costs
137	310	mW5qV9M	Chemical		Chemical	Europe	Europe	10+ Years	Senior Director or Senior Manager	Inflence and make decisions	Expert																			Strongly agree	Agree	Agree	Strongly agree	Agree	Strongly agree	Agree	Strongly agree	Strongly agree	Strongly agree	Agree	Agree	Strongly agree	Proximity to low-cost renewable energy as a resource for green hydrogen	Trade barriers, such as tariffs, quotas or local content requirements	Supportive policy framework with access to government subsidies or tax breaks for climate-friendly investments	Proximity to markets for climate-friendly industrial products	Proximity to industrial clusters in your sector or a related sector
138	311	R7XM9b1	Chemical		Chemical	Europe	Europe	3-5 Years	Subject Matter Expert	Influence, but don't make decisions	Informed, but not an expert																			Strongly agree	Agree	Strongly agree	Strongly agree	Agree	Agree	Strongly agree	Strongly agree	Agree	Strongly agree	Strongly agree	Agree	Agree	Supportive policy framework with access to government subsidies or tax breaks for climate-friendly investments	Low labor costs	Location of existing production site	Skilled workforce	Proximity to industrial clusters in your sector or a related sector
139	313	zv1ElBL	Steel		Steel	Europe	Europe	10+ Years	Senior Director or Senior Manager	Inflence and make decisions	Expert	Disagree	Strongly agree	Strongly agree	Agree	Agree	Strongly agree	Agree	Strongly agree	Disagree	Agree	Agree	Strongly agree	Agree	Location of existing production site	Geopolitical tensions and alliances	Proximity to low-cost renewable energy as a resource for green hydrogen	Supportive policy framework with access to government subsidies or tax breaks for climate-friendly investments	Low labor costs
140	314	1nzJ7KX	Steel		Steel	Europe	Europe	6-9 Years	Senior Director or Senior Manager	Inflence and make decisions	Expert	Agree	Agree	Strongly disagree	Strongly agree	Strongly agree	Agree	Strongly agree	Agree	Strongly agree	Strongly agree	Agree	Agree	Strongly agree	Location of existing production site	Supportive policy framework with access to government subsidies or tax breaks for climate-friendly investments	Proximity to markets for climate-friendly industrial products	Proximity to industrial clusters in your sector or a related sector	Proximity to low cost low natural gas as a feedstock for blue hydrogen
141	315	aAa4MGA	Steel		Steel	Europe	Europe	6-9 Years	Senior Director or Senior Manager	Inflence and make decisions	Expert	Strongly agree	Strongly agree	Agree	Agree	Disagree	Disagree	Agree	Strongly agree	Agree	Strongly agree	Agree	Strongly agree	Disagree	Location of existing production site	Supportive policy framework with access to government subsidies or tax breaks for climate-friendly investments	Trade barriers, such as tariffs, quotas or local content requirements	Low labor costs	Geopolitical tensions and alliances
142	317	BKveRLo	Chemical		Chemical	Europe	Europe	10+ Years	Senior Director or Senior Manager	Inflence and make decisions	Informed, but not an expert																			Agree	Strongly agree	Agree	Agree	Strongly agree	Agree	Strongly agree	Strongly agree	Agree	Agree	Agree	Strongly agree	Agree	Supportive policy framework with access to government subsidies or tax breaks for climate-friendly investments	Trade barriers, such as tariffs, quotas or local content requirements	Proximity to low-cost renewable energy as a resource for green hydrogen	Skilled workforce	Location of existing production site
143	318	Ar9WRNW	Steel		Steel	Europe	Europe	10+ Years	Senior Director or Senior Manager	Inflence and make decisions	Expert	Agree	Agree	Strongly agree	Agree	Strongly disagree	Agree	Strongly agree	Strongly agree	Agree	Agree	Strongly agree	Agree	Disagree	Location of existing production site	Supportive policy framework with access to government subsidies or tax breaks for climate-friendly investments	Low labor costs	Geopolitical tensions and alliances	Proximity to markets for climate-friendly industrial products
144	319	BKveRdo	Steel		Steel	Europe	Europe	10+ Years	Senior Director or Senior Manager	Inflence and make decisions	Expert	Agree	Strongly agree	Strongly disagree	Strongly agree	Agree	Strongly agree	Agree	Strongly agree	Strongly agree	Agree	Strongly agree	Agree	Strongly agree	Location of existing production site	Geopolitical tensions and alliances	Low labor costs	Trade barriers, such as tariffs, quotas or local content requirements	Proximity to markets for climate-friendly industrial products
145	320	n2ox7Zl	Steel		Steel	Europe	Europe	10+ Years	Senior Director or Senior Manager	Inflence and make decisions	Expert	Strongly agree	Agree	Strongly disagree	Agree	Strongly agree	Strongly agree	Agree	Agree	Strongly agree	Strongly agree	Agree	Agree	Strongly agree	Location of existing production site	Supportive policy framework with access to government subsidies or tax breaks for climate-friendly investments	Skilled workforce	Low labor costs	Proximity to industrial clusters in your sector or a related sector
146	323	VZrz20v	Steel		Steel	Europe	Europe	6-9 Years	C-Level	Inflence and make decisions	Expert	Strongly agree	Agree	Agree	Strongly agree	Agree	Strongly agree	Agree	Disagree	Agree	Strongly agree	Agree	Disagree	Disagree	Location of existing production site	Geopolitical tensions and alliances	Trade barriers, such as tariffs, quotas or local content requirements	Supportive policy framework with access to government subsidies or tax breaks for climate-friendly investments	Logistical infrastructure conditions
147	325	jvy01J9	Chemical		Chemical	Europe	Europe	6-9 Years	Subject Matter Expert	Inflence and make decisions	Expert																			Strongly agree	Agree	Agree	Strongly agree	Strongly agree	Agree	Strongly agree	Strongly agree	Strongly agree	Agree	Strongly agree	Strongly agree	Agree	Proximity to low-cost renewable energy as a resource for green hydrogen	Trade barriers, such as tariffs, quotas or local content requirements	Supportive policy framework with access to government subsidies or tax breaks for climate-friendly investments	Proximity to markets for climate-friendly industrial products	Overall investment climate and financing conditions/capital costs
148	326	W7KOYl4	Chemical		Chemical	North America	North America	10+ Years	Senior Director or Senior Manager	Inflence and make decisions	Expert																			Strongly agree	Agree	Disagree	Strongly agree	Agree	Agree	Strongly agree	Disagree	Agree	Agree	Strongly agree	Agree	Agree	Geopolitical tensions and alliances	Proximity to low-cost renewable energy as a resource for green hydrogen	Overall investment climate and financing conditions/capital costs	Trade barriers, such as tariffs, quotas or local content requirements	Supportive policy framework with access to government subsidies or tax breaks for climate-friendly investments
149	327	q8MGEeV	Steel		Steel	Europe	Europe	10+ Years	Vice President or Above	Inflence and make decisions	Expert	Strongly agree	Agree	Disagree	Strongly agree	Agree	Strongly agree	Agree	Strongly agree	Disagree	Agree	Strongly agree	Agree	Agree	Location of existing production site	Supportive policy framework with access to government subsidies or tax breaks for climate-friendly investments	Geopolitical tensions and alliances	Skilled workforce	Proximity to industrial clusters in your sector or a related sector
150	329	O7MbBze	Steel		Steel	Europe	Europe	10+ Years	Senior Director or Senior Manager	Inflence and make decisions	Expert	Strongly agree	Agree	Strongly disagree	Agree	Strongly agree	Strongly agree	Strongly agree	Agree	Agree	Strongly agree	Agree	Agree	Strongly agree	Proximity to low-cost renewable energy as a resource for green hydrogen	Trade barriers, such as tariffs, quotas or local content requirements	Skilled workforce	Low labor costs	Proximity to markets for climate-friendly industrial products
151	331	rMLx7gJ	Chemical		Chemical	North America	North America	6-9 Years	Vice President or Above	Inflence and make decisions	Informed, but not an expert																			Strongly agree	Disagree	Agree	Agree	Strongly agree	Strongly agree	Disagree	Agree	Strongly agree	Agree	Agree	Agree	Strongly agree	Trade barriers, such as tariffs, quotas or local content requirements	Proximity to low-cost renewable energy as a resource for green hydrogen	Proximity to markets for climate-friendly industrial products	Low labor costs	Proximity to industrial clusters in your sector or a related sector
152	333	Zl0KvNr	Chemical		Chemical	North America	North America	3-5 Years	Vice President or Above	Inflence and make decisions	Expert																			Strongly agree	Disagree	Agree	Agree	Strongly agree	Agree	Strongly agree	Disagree	Agree	Agree	Strongly agree	Agree	Agree	Skilled workforce	Proximity to low-cost renewable energy as a resource for green hydrogen	Trade barriers, such as tariffs, quotas or local content requirements	Proximity to industrial clusters in your sector or a related sector	Proximity to markets for climate-friendly industrial products
153	334	Q748jJb	Steel		Steel	Europe	Europe	3-5 Years	Senior Director or Senior Manager	Inflence and make decisions	Expert	Agree	Strongly agree	Disagree	Strongly agree	Agree	Strongly agree	Agree	Agree	Agree	Strongly agree	Agree	Agree	Strongly agree	Location of existing production site	Supportive policy framework with access to government subsidies or tax breaks for climate-friendly investments	Geopolitical tensions and alliances	Low labor costs	Proximity to markets for climate-friendly industrial products
154	335	8G0e7VX	Steel		Steel	Europe	Europe	3-5 Years	Vice President or Above	Inflence and make decisions	Expert	Agree	Agree	Strongly agree	Agree	Strongly agree	Strongly agree	Agree	Agree	Strongly agree	Strongly agree	Agree	Agree	Strongly agree	Supportive policy framework with access to government subsidies or tax breaks for climate-friendly investments	Geopolitical tensions and alliances	Skilled workforce	Low labor costs	Proximity to industrial clusters in your sector or a related sector
155	337	zv1ElMx	Chemical		Chemical	Europe	Europe	10+ Years	Senior Director or Senior Manager	Inflence and make decisions	Expert																			Agree	Strongly agree	Strongly agree	Agree	Strongly agree	Strongly agree	Strongly agree	Agree	Strongly agree	Agree	Strongly agree	Strongly agree	Agree	Proximity to low-cost renewable energy as a resource for green hydrogen	Skilled workforce	Trade barriers, such as tariffs, quotas or local content requirements	Overall investment climate and financing conditions/capital costs	Proximity to low cost low natural gas as a feedstock for blue hydrogen
156	339	O7MbB1X	Chemical		Chemical	Europe	Europe	6-9 Years	Senior Director or Senior Manager	Inflence and make decisions	Expert																			Strongly agree	Agree	Agree	Strongly agree	Agree	Strongly agree	Agree	Strongly agree	Strongly agree	Agree	Agree	Agree	Strongly agree	Geopolitical tensions and alliances	Trade barriers, such as tariffs, quotas or local content requirements	Skilled workforce	Proximity to markets for climate-friendly industrial products	Proximity to industrial clusters in your sector or a related sector
157	340	davOXzx	Steel		Steel	Europe	Europe	6-9 Years	Senior Director or Senior Manager	Inflence and make decisions	Expert	Agree	Agree	Strongly agree	Agree	Strongly agree	Agree	Agree	Agree	Strongly agree	Disagree	Agree	Agree	Strongly agree	Location of existing production site	Geopolitical tensions and alliances	Trade barriers, such as tariffs, quotas or local content requirements	Skilled workforce	Low labor costs
158	342	aAa4MLB	Chemical		Chemical	Europe	Europe	10+ Years	Senior Director or Senior Manager	Inflence and make decisions	Expert																			Agree	Strongly agree	Disagree	Agree	Strongly agree	Agree	Strongly agree	Strongly agree	Strongly agree	Agree	Strongly agree	Strongly agree	Agree	Supportive policy framework with access to government subsidies or tax breaks for climate-friendly investments	Proximity to markets for climate-friendly industrial products	Overall investment climate and financing conditions/capital costs	Trade barriers, such as tariffs, quotas or local content requirements	Proximity to low cost low natural gas as a feedstock for blue hydrogen
159	343	n2ox7gg	Chemical		Chemical	Europe	Europe	6-9 Years	Senior Director or Senior Manager	Inflence and make decisions	Expert																			Strongly agree	Strongly agree	Strongly agree	Strongly agree	Strongly agree	Strongly agree	Strongly agree	Strongly agree	Agree	Strongly agree	Strongly agree	Agree	Strongly agree	Location of existing production site	Supportive policy framework with access to government subsidies or tax breaks for climate-friendly investments	Low labor costs	Trade barriers, such as tariffs, quotas or local content requirements	Overall investment climate and financing conditions/capital costs
160	346	2vOr7V1	Chemical		Chemical	Europe	Europe	10+ Years	Senior Director or Senior Manager	Inflence and make decisions	Expert																			Strongly agree	Strongly agree	Agree	Strongly agree	Strongly agree	Strongly agree	Strongly agree	Strongly agree	Agree	Strongly agree	Strongly agree	Strongly agree	Strongly agree	Trade barriers, such as tariffs, quotas or local content requirements	Supportive policy framework with access to government subsidies or tax breaks for climate-friendly investments	Proximity to low-cost renewable energy as a resource for green hydrogen	Proximity to industrial clusters in your sector or a related sector	Overall investment climate and financing conditions/capital costs
161	347	Zl0Kvz2	Steel		Steel	Europe	Europe	6-9 Years	Senior Director or Senior Manager	Inflence and make decisions	Expert	Agree	Agree	Strongly disagree	Agree	Strongly agree	Strongly agree	Agree	Agree	Strongly agree	Agree	Agree	Strongly agree	Agree	Location of existing production site	Trade barriers, such as tariffs, quotas or local content requirements	Proximity to markets for climate-friendly industrial products	Logistical infrastructure conditions	Skilled workforce
162	349	q8MGEb2	Chemical		Chemical	North America	North America	10+ Years	Senior Director or Senior Manager	Inflence and make decisions	Expert																			Strongly agree	Agree	Agree	Agree	Strongly agree	Agree	Disagree	Agree	Strongly agree	Strongly agree	Agree	Strongly agree	Strongly agree	Overall investment climate and financing conditions/capital costs	Supportive policy framework with access to government subsidies or tax breaks for climate-friendly investments	Trade barriers, such as tariffs, quotas or local content requirements	Proximity to low-cost renewable energy as a resource for green hydrogen	Proximity to industrial clusters in your sector or a related sector
163	352	n2ox76J	Chemical		Chemical	Latin America	Latin America	6-9 Years	Vice President or Above	Inflence and make decisions	Expert																			Agree	Agree	Strongly agree	Agree	Strongly agree	Agree	Agree	Strongly agree	Agree	Agree	Agree	Strongly agree	Agree	Proximity to low-cost renewable energy as a resource for green hydrogen	Trade barriers, such as tariffs, quotas or local content requirements	Supportive policy framework with access to government subsidies or tax breaks for climate-friendly investments	Geopolitical tensions and alliances	Location of existing production site
164	353	Ar9WRLa	Chemical		Chemical	Latin America	Latin America	6-9 Years	Vice President or Above	Inflence and make decisions	Expert																			Strongly agree	Strongly agree	Agree	Agree	Strongly agree	Agree	Strongly agree	Agree	Strongly agree	Agree	Agree	Agree	Agree	Proximity to low-cost renewable energy as a resource for green hydrogen	Geopolitical tensions and alliances	Location of existing production site	Supportive policy framework with access to government subsidies or tax breaks for climate-friendly investments	Proximity to markets for climate-friendly industrial products
165	354	2vOr7gJ	Steel		Steel	Latin America	Latin America	10+ Years	Senior Director or Senior Manager	Inflence and make decisions	Expert	Agree	Strongly agree	Strongly agree	Agree	Agree	Disagree	Agree	Agree	Agree	Agree	Strongly agree	Agree	Agree	Proximity to low-cost renewable energy as a resource for green hydrogen	Geopolitical tensions and alliances	Trade barriers, such as tariffs, quotas or local content requirements	Supportive policy framework with access to government subsidies or tax breaks for climate-friendly investments	Location of existing production site
166	355	BKveRpq	Steel		Steel	Latin America	Latin America	10+ Years	Senior Director or Senior Manager	Inflence and make decisions	Expert	Strongly agree	Agree	Strongly agree	Agree	Strongly agree	Agree	Disagree	Strongly agree	Agree	Strongly agree	Agree	Agree	Agree	Proximity to low-cost renewable energy as a resource for green hydrogen	Geopolitical tensions and alliances	Low labor costs	Supportive policy framework with access to government subsidies or tax breaks for climate-friendly investments	Location of existing production site
167	356	jvy01Ev	Steel		Steel	Latin America	Latin America	6-9 Years	Vice President or Above	Inflence and make decisions	Expert	Agree	Agree	Strongly agree	Strongly agree	Strongly agree	Agree	Agree	Strongly agree	Agree	Agree	Agree	Strongly agree	Strongly agree	Location of existing production site	Proximity to low-cost renewable energy as a resource for green hydrogen	Supportive policy framework with access to government subsidies or tax breaks for climate-friendly investments	Skilled workforce	Proximity to markets for climate-friendly industrial products
168	358	8G0e7L7	Steel		Steel	Latin America	Latin America	10+ Years	Vice President or Above	Inflence and make decisions	Expert	Strongly agree	Agree	Disagree	Disagree	Disagree	Disagree	Strongly agree	Disagree	Strongly disagree	Strongly disagree	Disagree	Agree	Strongly agree	Proximity to low-cost renewable energy as a resource for green hydrogen	Supportive policy framework with access to government subsidies or tax breaks for climate-friendly investments	Trade barriers, such as tariffs, quotas or local content requirements	Proximity to markets for climate-friendly industrial products	Skilled workforce
169	359	pv8q7WL	Chemical		Chemical	Latin America	Latin America	6-9 Years	Senior Director or Senior Manager	Influence, but don't make decisions	Informed, but not an expert																			Disagree	Strongly agree	Disagree	Strongly agree	Agree	Strongly agree	Disagree	Strongly agree	Disagree	Strongly disagree	Agree	Strongly disagree	Strongly agree	Location of existing production site	Proximity to low-cost renewable energy as a resource for green hydrogen	Geopolitical tensions and alliances	Supportive policy framework with access to government subsidies or tax breaks for climate-friendly investments	Low labor costs
170	360	MORmEGm	Steel		Steel	Latin America	Latin America	10+ Years	Vice President or Above	Inflence and make decisions	Expert	Strongly agree	Disagree	Disagree	Strongly agree	Agree	Disagree	Strongly agree	Strongly agree	Disagree	Disagree	Strongly disagree	Strongly disagree	Agree	Proximity to low-cost renewable energy as a resource for green hydrogen	Supportive policy framework with access to government subsidies or tax breaks for climate-friendly investments	Skilled workforce	Low labor costs	Proximity to industrial clusters in your sector or a related sector
171	361	mW5qVEK	Steel		Steel	Latin America	Latin America	10+ Years	Vice President or Above	Influence, but don't make decisions	Informed, but not an expert	Agree	Disagree	Strongly agree	Strongly agree	Agree	Agree	Disagree	Disagree	Disagree	Agree	Strongly disagree	Agree	Strongly agree	Proximity to low-cost renewable energy as a resource for green hydrogen	Trade barriers, such as tariffs, quotas or local content requirements	Supportive policy framework with access to government subsidies or tax breaks for climate-friendly investments	Overall investment climate and financing conditions/capital costs	Proximity to industrial clusters in your sector or a related sector
172	365	P7LAq6n	Steel		Steel	Latin America	Latin America	10+ Years	Vice President or Above	Inflence and make decisions	Expert	Strongly agree	Agree	Agree	Strongly agree	Agree	Strongly agree	Disagree	Strongly agree	Strongly agree	Agree	Strongly agree	Disagree	Agree	Proximity to low-cost renewable energy as a resource for green hydrogen	Supportive policy framework with access to government subsidies or tax breaks for climate-friendly investments	Proximity to low cost low natural gas as a feedstock for blue hydrogen	Overall investment climate and financing conditions/capital costs	Trade barriers, such as tariffs, quotas or local content requirements
173	366	xvryd4l	Chemical		Chemical	Latin America	Latin America	10+ Years	Vice President or Above	Inflence and make decisions	Expert																			Agree	Strongly agree	Agree	Strongly agree	Strongly agree	Agree	Strongly agree	Agree	Strongly agree	Strongly agree	Disagree	Agree	Strongly agree	Proximity to low-cost renewable energy as a resource for green hydrogen	Supportive policy framework with access to government subsidies or tax breaks for climate-friendly investments	Proximity to industrial clusters in your sector or a related sector	Overall investment climate and financing conditions/capital costs	Trade barriers, such as tariffs, quotas or local content requirements
174	369	oqRdm2x	Chemical		Chemical	Latin America	Latin America	10+ Years	Senior Director or Senior Manager	Inflence and make decisions	Expert																			Strongly agree	Agree	Strongly agree	Agree	Strongly agree	Strongly agree	Agree	Agree	Strongly agree	Agree	Disagree	Strongly agree	Strongly agree	Supportive policy framework with access to government subsidies or tax breaks for climate-friendly investments	Proximity to low-cost renewable energy as a resource for green hydrogen	Overall investment climate and financing conditions/capital costs	Trade barriers, such as tariffs, quotas or local content requirements	Proximity to low cost low natural gas as a feedstock for blue hydrogen
175	370	4lrpGNl	Steel		Steel	Latin America	Latin America	6-9 Years	Senior Director or Senior Manager	Inflence and make decisions	Expert	Agree	Agree	Strongly agree	Disagree	Strongly agree	Strongly agree	Agree	Strongly agree	Strongly agree	Strongly agree	Agree	Disagree	Agree	Proximity to low-cost renewable energy as a resource for green hydrogen	Supportive policy framework with access to government subsidies or tax breaks for climate-friendly investments	Overall investment climate and financing conditions/capital costs	Proximity to low cost low natural gas as a feedstock for blue hydrogen	Trade barriers, such as tariffs, quotas or local content requirements
176	371	MORBXvd	Steel		Steel	Latin America	Latin America	6-9 Years	Vice President or Above	Inflence and make decisions	Expert	Agree	Agree	Strongly agree	Strongly agree	Strongly agree	Agree	Strongly agree	Strongly agree	Disagree	Agree	Agree	Strongly agree	Strongly agree	Proximity to low-cost renewable energy as a resource for green hydrogen	Supportive policy framework with access to government subsidies or tax breaks for climate-friendly investments	Proximity to low cost low natural gas as a feedstock for blue hydrogen	Proximity to markets for climate-friendly industrial products	Proximity to industrial clusters in your sector or a related sector
177	372	7mZWq1j	Steel		Steel	Latin America	Latin America	10+ Years	Senior Director or Senior Manager	Inflence and make decisions	Expert	Agree	Agree	Strongly agree	Disagree	Agree	Strongly agree	Agree	Strongly agree	Disagree	Agree	Strongly agree	Agree	Strongly agree	Proximity to low-cost renewable energy as a resource for green hydrogen	Supportive policy framework with access to government subsidies or tax breaks for climate-friendly investments	Trade barriers, such as tariffs, quotas or local content requirements	Proximity to low cost low natural gas as a feedstock for blue hydrogen	Overall investment climate and financing conditions/capital costs
178	376	4lrprVe	Chemical		Chemical	North America	North America	6-9 Years	Vice President or Above	Inflence and make decisions	Expert																			Strongly agree	Strongly agree	Agree	Strongly agree	Agree	Strongly agree	Strongly agree	Agree	Strongly agree	Agree	Strongly agree	Strongly agree	Agree	Trade barriers, such as tariffs, quotas or local content requirements	Proximity to low-cost renewable energy as a resource for green hydrogen	Location of existing production site	Supportive policy framework with access to government subsidies or tax breaks for climate-friendly investments	Proximity to markets for climate-friendly industrial products
179	491	W7XJqeb	Steel		Steel	Africa	Africa	6-9 Years	Vice President or Above	Inflence and make decisions	Expert	Disagree	Agree	Strongly agree	Disagree	Strongly disagree	Strongly agree	Strongly agree	Agree	Strongly agree	Agree	Strongly agree	Disagree	Strongly agree	Location of existing production site	Geopolitical tensions and alliances	Trade barriers, such as tariffs, quotas or local content requirements	Low labor costs	Supportive policy framework with access to government subsidies or tax breaks for climate-friendly investments
180	492	VZ4O7yG	Steel		Steel	Africa	Africa	6-9 Years	Senior Director or Senior Manager	Inflence and make decisions	Expert	Agree	Agree	Strongly disagree	Strongly agree	Disagree	Agree	Disagree	Strongly agree	Agree	Strongly disagree	Disagree	Disagree	Strongly agree	Proximity to low-cost renewable energy as a resource for green hydrogen	Low labor costs	Skilled workforce	Trade barriers, such as tariffs, quotas or local content requirements	Proximity to markets for climate-friendly industrial products
181	497	R7VLnRr	Chemical		Chemical	Africa	Africa	6-9 Years	Vice President or Above	Inflence and make decisions	Expert																			Disagree	Disagree	Strongly agree	Agree	Agree	Strongly agree	Disagree	Agree	Disagree	Agree	Disagree	Disagree	Strongly agree	Skilled workforce	Supportive policy framework with access to government subsidies or tax breaks for climate-friendly investments	Trade barriers, such as tariffs, quotas or local content requirements	Proximity to low-cost renewable energy as a resource for green hydrogen	Low labor costs
182	500	Lz7WxEZ	Steel		Steel	Africa	Africa	3-5 Years	Senior Director or Senior Manager	Inflence and make decisions	Expert	Agree	Agree	Strongly agree	Strongly agree	Agree	Agree	Strongly agree	Disagree	Agree	Agree	Strongly disagree	Disagree	Disagree	Proximity to low-cost renewable energy as a resource for green hydrogen	Trade barriers, such as tariffs, quotas or local content requirements	Proximity to markets for climate-friendly industrial products	Supportive policy framework with access to government subsidies or tax breaks for climate-friendly investments	Skilled workforce
183	503	q87pjyx	Steel		Steel	Africa	Africa	6-9 Years	Senior Director or Senior Manager	Inflence and make decisions	Expert	Strongly agree	Agree	Strongly agree	Agree	Agree	Agree	Strongly agree	Strongly agree	Disagree	Agree	Strongly agree	Strongly agree	Agree	Proximity to low-cost renewable energy as a resource for green hydrogen	Trade barriers, such as tariffs, quotas or local content requirements	Low labor costs	Supportive policy framework with access to government subsidies or tax breaks for climate-friendly investments	Proximity to markets for climate-friendly industrial products
184	505	dad8j7P	Steel		Steel	Africa	Africa	6-9 Years	Vice President or Above	Inflence and make decisions	Expert	Strongly agree	Disagree	Disagree	Strongly agree	Strongly agree	Agree	Strongly agree	Strongly disagree	Disagree	Agree	Agree	Disagree	Strongly agree	Geopolitical tensions and alliances	Low labor costs	Supportive policy framework with access to government subsidies or tax breaks for climate-friendly investments	Trade barriers, such as tariffs, quotas or local content requirements	Proximity to low-cost renewable energy as a resource for green hydrogen
185	506	xv87Lqx	Steel		Steel	Africa	Africa	6-9 Years	Vice President or Above	Inflence and make decisions	Expert	Agree	Disagree	Strongly agree	Agree	Disagree	Strongly agree	Agree	Agree	Strongly agree	Disagree	Agree	Agree	Disagree	Proximity to low-cost renewable energy as a resource for green hydrogen	Geopolitical tensions and alliances	Supportive policy framework with access to government subsidies or tax breaks for climate-friendly investments	Skilled workforce	Proximity to industrial clusters in your sector or a related sector
186	507	2vXNAnb	Steel		Steel	Africa	Africa	6-9 Years	Vice President or Above	Inflence and make decisions	Expert	Agree	Agree	Strongly agree	Strongly agree	Agree	Strongly agree	Agree	Agree	Disagree	Strongly agree	Strongly disagree	Disagree	Disagree	Trade barriers, such as tariffs, quotas or local content requirements	Low labor costs	Supportive policy framework with access to government subsidies or tax breaks for climate-friendly investments	Proximity to markets for climate-friendly industrial products	Overall investment climate and financing conditions/capital costs
187	508	G8APg1o	Chemical		Chemical	Africa	Africa	6-9 Years	Senior Director or Senior Manager	Inflence and make decisions	Expert																			Agree	Strongly agree	Disagree	Disagree	Strongly agree	Disagree	Strongly agree	Agree	Agree	Disagree	Strongly agree	Strongly agree	Disagree	Geopolitical tensions and alliances	Low labor costs	Skilled workforce	Logistical infrastructure conditions	Proximity to low cost low natural gas as a feedstock for blue hydrogen
188	509	Ara7Kn0	Chemical		Chemical	Africa	Africa	3-5 Years	Senior Director or Senior Manager	Inflence and make decisions	Expert																			Agree	Agree	Agree	Strongly agree	Strongly agree	Agree	Strongly agree	Agree	Strongly agree	Agree	Strongly agree	Agree	Strongly agree	Location of existing production site	Geopolitical tensions and alliances	Supportive policy framework with access to government subsidies or tax breaks for climate-friendly investments	Trade barriers, such as tariffs, quotas or local content requirements	Proximity to markets for climate-friendly industrial products
189	511	P7W8x71	Steel		Steel	Africa	Africa	6-9 Years	Senior Director or Senior Manager	Inflence and make decisions	Expert	Strongly agree	Agree	Strongly agree	Strongly agree	Strongly agree	Agree	Strongly agree	Strongly agree	Strongly disagree	Disagree	Disagree	Agree	Agree	Location of existing production site	Geopolitical tensions and alliances	Trade barriers, such as tariffs, quotas or local content requirements	Skilled workforce	Low labor costs
190	515	4lOMl79	Chemical		Chemical	Africa	Africa	10+ Years	C-Level	Inflence and make decisions	Expert																			Strongly agree	Agree	Strongly agree	Agree	Strongly agree	Agree	Strongly agree	Disagree	Agree	Disagree	Strongly agree	Agree	Strongly agree	Location of existing production site	Proximity to industrial clusters in your sector or a related sector	Low labor costs	Trade barriers, such as tariffs, quotas or local content requirements	Logistical infrastructure conditions
191	516	ZlJbaN6	Chemical		Chemical	Latin America	Latin America	6-9 Years	Senior Director or Senior Manager	Inflence and make decisions	Expert																			Agree	Strongly agree	Strongly agree	Agree	Disagree	Strongly agree	Agree	Strongly agree	Disagree	Agree	Agree	Agree	Strongly agree	Proximity to low-cost renewable energy as a resource for green hydrogen	Trade barriers, such as tariffs, quotas or local content requirements	Geopolitical tensions and alliances	Skilled workforce	Supportive policy framework with access to government subsidies or tax breaks for climate-friendly investments
192	520	pvPVLrE	Chemical		Chemical	Latin America	Latin America	10+ Years	Subject Matter Expert	Inflence and make decisions	Expert																			Agree	Agree	Strongly agree	Agree	Disagree	Strongly agree	Disagree	Agree	Strongly disagree	Agree	Disagree	Strongly disagree	Strongly agree	Location of existing production site	Geopolitical tensions and alliances	Low labor costs	Proximity to industrial clusters in your sector or a related sector	Proximity to low cost low natural gas as a feedstock for blue hydrogen
193	524	gGxoMYL	Chemical		Chemical	Africa	Africa	3-5 Years	C-Level	Inflence and make decisions	Expert																			Strongly agree	Agree	Agree	Strongly agree	Strongly agree	Strongly agree	Agree	Agree	Strongly agree	Strongly agree	Strongly agree	Strongly agree	Agree	Geopolitical tensions and alliances	Proximity to low-cost renewable energy as a resource for green hydrogen	Supportive policy framework with access to government subsidies or tax breaks for climate-friendly investments	Proximity to industrial clusters in your sector or a related sector	Overall investment climate and financing conditions/capital costs
194	525	NjogyYQ	Chemical		Chemical	Africa	Africa	6-9 Years	C-Level	Inflence and make decisions	Expert																			Disagree	Strongly agree	Agree	Agree	Strongly agree	Strongly agree	Strongly agree	Disagree	Agree	Agree	Strongly agree	Agree	Strongly agree	Geopolitical tensions and alliances	Trade barriers, such as tariffs, quotas or local content requirements	Low labor costs	Proximity to markets for climate-friendly industrial products	Skilled workforce
195	526	vz6oMgM	Chemical		Chemical	Africa	Africa	6-9 Years	C-Level	Inflence and make decisions	Expert																			Agree	Strongly agree	Strongly agree	Agree	Agree	Agree	Strongly agree	Strongly agree	Disagree	Agree	Agree	Strongly agree	Agree	Supportive policy framework with access to government subsidies or tax breaks for climate-friendly investments	Trade barriers, such as tariffs, quotas or local content requirements	Geopolitical tensions and alliances	Proximity to markets for climate-friendly industrial products	Overall investment climate and financing conditions/capital costs
196	528	98Zv81X	Chemical		Chemical	Africa	Africa	6-9 Years	Vice President or Above	Inflence and make decisions	Expert																			Strongly agree	Strongly agree	Disagree	Agree	Agree	Agree	Strongly agree	Strongly agree	Agree	Strongly agree	Strongly agree	Strongly agree	Agree	Trade barriers, such as tariffs, quotas or local content requirements	Skilled workforce	Proximity to markets for climate-friendly industrial products	Proximity to low-cost renewable energy as a resource for green hydrogen	Supportive policy framework with access to government subsidies or tax breaks for climate-friendly investments
197	529	n2B62QX	Chemical		Chemical	Africa	Africa	6-9 Years	C-Level	Inflence and make decisions	Expert																			Agree	Agree	Agree	Strongly agree	Strongly agree	Strongly agree	Agree	Agree	Agree	Strongly agree	Agree	Agree	Strongly agree	Proximity to low-cost renewable energy as a resource for green hydrogen	Location of existing production site	Geopolitical tensions and alliances	Overall investment climate and financing conditions/capital costs	Skilled workforce
198	530	yrMLrQp	Chemical		Chemical	Africa	Africa	6-9 Years	Vice President or Above	Inflence and make decisions	Expert																			Agree	Strongly agree	Strongly agree	Agree	Strongly agree	Strongly agree	Strongly agree	Agree	Strongly agree	Agree	Agree	Strongly agree	Strongly agree	Location of existing production site	Geopolitical tensions and alliances	Supportive policy framework with access to government subsidies or tax breaks for climate-friendly investments	Proximity to low-cost renewable energy as a resource for green hydrogen	Proximity to markets for climate-friendly industrial products
199	532	zvL42qO	Chemical		Chemical	Africa	Africa	6-9 Years	Vice President or Above	Inflence and make decisions	Expert																			Agree	Strongly agree	Strongly agree	Agree	Strongly agree	Strongly agree	Strongly agree	Disagree	Agree	Agree	Strongly agree	Agree	Strongly agree	Proximity to low-cost renewable energy as a resource for green hydrogen	Trade barriers, such as tariffs, quotas or local content requirements	Supportive policy framework with access to government subsidies or tax breaks for climate-friendly investments	Skilled workforce	Proximity to low cost low natural gas as a feedstock for blue hydrogen
200	533	AraLBdN	Chemical		Chemical	Africa	Africa	6-9 Years	C-Level	Inflence and make decisions	Expert																			Strongly agree	Agree	Strongly agree	Strongly agree	Strongly agree	Agree	Strongly agree	Agree	Agree	Strongly agree	Strongly agree	Agree	Agree	Proximity to markets for climate-friendly industrial products	Geopolitical tensions and alliances	Location of existing production site	Skilled workforce	Low labor costs
201	538	AraL7lB	Chemical		Chemical	Africa	Africa	6-9 Years	Vice President or Above	Inflence and make decisions	Expert																			Agree	Agree	Strongly agree	Strongly agree	Strongly agree	Strongly agree	Strongly agree	Agree	Agree	Agree	Strongly agree	Strongly agree	Strongly agree	Location of existing production site	Trade barriers, such as tariffs, quotas or local content requirements	Supportive policy framework with access to government subsidies or tax breaks for climate-friendly investments	Geopolitical tensions and alliances	Skilled workforce
202	539	n2B6P8P	Chemical		Chemical	Africa	Africa	6-9 Years	C-Level	Inflence and make decisions	Expert																			Strongly agree	Agree	Strongly agree	Agree	Strongly agree	Strongly agree	Agree	Agree	Strongly agree	Agree	Strongly agree	Strongly agree	Agree	Location of existing production site	Geopolitical tensions and alliances	Proximity to low-cost renewable energy as a resource for green hydrogen	Trade barriers, such as tariffs, quotas or local content requirements	Proximity to industrial clusters in your sector or a related sector
203	541	q87op4e	Chemical		Chemical	Africa	Africa	6-9 Years	C-Level	Inflence and make decisions	Expert																			Strongly agree	Agree	Agree	Agree	Strongly agree	Agree	Agree	Strongly agree	Agree	Strongly agree	Strongly agree	Agree	Strongly agree	Proximity to low-cost renewable energy as a resource for green hydrogen	Low labor costs	Skilled workforce	Overall investment climate and financing conditions/capital costs	Logistical infrastructure conditions
204	542	ErGO0db	Chemical		Chemical	Africa	Africa	10+ Years	C-Level	Inflence and make decisions	Expert																			Strongly agree	Agree	Agree	Strongly agree	Agree	Strongly agree	Strongly agree	Agree	Strongly agree	Strongly agree	Agree	Agree	Strongly agree	Geopolitical tensions and alliances	Trade barriers, such as tariffs, quotas or local content requirements	Proximity to low-cost renewable energy as a resource for green hydrogen	Location of existing production site	Supportive policy framework with access to government subsidies or tax breaks for climate-friendly investments
205	544	P7Wd8lW	Chemical		Chemical	Africa	Africa	6-9 Years	C-Level	Inflence and make decisions	Expert																			Agree	Agree	Strongly agree	Agree	Strongly agree	Strongly agree	Strongly agree	Agree	Agree	Strongly agree	Agree	Strongly agree	Strongly agree	Trade barriers, such as tariffs, quotas or local content requirements	Location of existing production site	Skilled workforce	Low labor costs	Overall investment climate and financing conditions/capital costs
206	545	n2B6P4o	Chemical		Chemical	Africa	Africa	6-9 Years	C-Level	Inflence and make decisions	Expert																			Strongly agree	Agree	Strongly agree	Agree	Agree	Agree	Strongly agree	Strongly agree	Agree	Strongly agree	Agree	Strongly agree	Strongly agree	Proximity to low-cost renewable energy as a resource for green hydrogen	Location of existing production site	Trade barriers, such as tariffs, quotas or local content requirements	Supportive policy framework with access to government subsidies or tax breaks for climate-friendly investments	Geopolitical tensions and alliances
207	548	q87op2X	Chemical		Chemical	Africa	Africa	6-9 Years	Vice President or Above	Inflence and make decisions	Expert																			Strongly agree	Agree	Strongly agree	Agree	Strongly agree	Strongly agree	Agree	Strongly agree	Agree	Agree	Strongly agree	Agree	Strongly agree	Proximity to low-cost renewable energy as a resource for green hydrogen	Supportive policy framework with access to government subsidies or tax breaks for climate-friendly investments	Geopolitical tensions and alliances	Skilled workforce	Low labor costs
208	549	8G19vr5	Chemical		Chemical	Africa	Africa	10+ Years	Vice President or Above	Inflence and make decisions	Expert																			Strongly agree	Disagree	Strongly agree	Agree	Strongly agree	Strongly agree	Agree	Strongly agree	Disagree	Agree	Strongly agree	Agree	Agree	Proximity to low-cost renewable energy as a resource for green hydrogen	Supportive policy framework with access to government subsidies or tax breaks for climate-friendly investments	Low labor costs	Skilled workforce	Trade barriers, such as tariffs, quotas or local content requirements
209	551	1n4eoMd	Chemical		Chemical	Africa	Africa	10+ Years	C-Level	Inflence and make decisions	Expert																			Strongly agree	Agree	Agree	Strongly agree	Agree	Strongly agree	Agree	Agree	Agree	Strongly agree	Agree	Agree	Strongly agree	Location of existing production site	Trade barriers, such as tariffs, quotas or local content requirements	Proximity to low-cost renewable energy as a resource for green hydrogen	Low labor costs	Supportive policy framework with access to government subsidies or tax breaks for climate-friendly investments
210	554	5oJbNzq	Chemical		Chemical	Africa	Africa	10+ Years	C-Level	Inflence and make decisions	Expert																			Strongly agree	Agree	Strongly agree	Agree	Agree	Strongly agree	Agree	Agree	Agree	Strongly agree	Agree	Agree	Strongly agree	Low labor costs	Skilled workforce	Proximity to markets for climate-friendly industrial products	Proximity to industrial clusters in your sector or a related sector	Overall investment climate and financing conditions/capital costs
211	565	ZlJBvAn	Chemical		Chemical	Latin America	Latin America	6-9 Years	Vice President or Above	Inflence and make decisions	Expert																			Strongly agree	Agree	Strongly agree	Agree	Strongly agree	Strongly agree	Agree	Strongly agree	Agree	Strongly agree	Agree	Strongly agree	Agree	Proximity to low-cost renewable energy as a resource for green hydrogen	Supportive policy framework with access to government subsidies or tax breaks for climate-friendly investments	Trade barriers, such as tariffs, quotas or local content requirements	Low labor costs	Proximity to markets for climate-friendly industrial products
212	566	1n4e7QP	Chemical		Chemical	Latin America	Latin America	6-9 Years	Vice President or Above	Inflence and make decisions	Expert																			Strongly agree	Agree	Strongly agree	Agree	Agree	Strongly agree	Agree	Disagree	Agree	Strongly agree	Agree	Strongly agree	Agree	Trade barriers, such as tariffs, quotas or local content requirements	Supportive policy framework with access to government subsidies or tax breaks for climate-friendly investments	Low labor costs	Skilled workforce	Proximity to industrial clusters in your sector or a related sector
213	567	KXP0E14	Chemical		Chemical	Latin America	Latin America	6-9 Years	Vice President or Above	Inflence and make decisions	Expert																			Strongly agree	Agree	Strongly agree	Agree	Strongly agree	Strongly agree	Agree	Agree	Strongly agree	Agree	Strongly agree	Agree	Agree	Proximity to low-cost renewable energy as a resource for green hydrogen	Supportive policy framework with access to government subsidies or tax breaks for climate-friendly investments	Trade barriers, such as tariffs, quotas or local content requirements	Proximity to markets for climate-friendly industrial products	Proximity to industrial clusters in your sector or a related sector
214	570	rM5oxKz	Chemical		Chemical	Latin America	Latin America	10+ Years	C-Level	Inflence and make decisions	Expert																			Agree	Strongly agree	Agree	Agree	Strongly agree	Agree	Agree	Strongly agree	Agree	Strongly agree	Agree	Strongly agree	Strongly agree	Proximity to low-cost renewable energy as a resource for green hydrogen	Supportive policy framework with access to government subsidies or tax breaks for climate-friendly investments	Trade barriers, such as tariffs, quotas or local content requirements	Skilled workforce	Low labor costs
215	572	8G19e55	Chemical		Chemical	Latin America	Latin America	10+ Years	C-Level	Inflence and make decisions	Expert																			Strongly agree	Agree	Agree	Strongly agree	Strongly agree	Strongly agree	Agree	Agree	Agree	Strongly agree	Agree	Strongly agree	Agree	Proximity to low-cost renewable energy as a resource for green hydrogen	Location of existing production site	Trade barriers, such as tariffs, quotas or local content requirements	Skilled workforce	Supportive policy framework with access to government subsidies or tax breaks for climate-friendly investments
216	573	J4yZVv2	Chemical		Chemical	Latin America	Latin America	10+ Years	C-Level	Inflence and make decisions	Expert																			Strongly agree	Agree	Agree	Strongly agree	Agree	Strongly agree	Agree	Agree	Disagree	Agree	Agree	Strongly agree	Strongly agree	Proximity to low-cost renewable energy as a resource for green hydrogen	Supportive policy framework with access to government subsidies or tax breaks for climate-friendly investments	Trade barriers, such as tariffs, quotas or local content requirements	Low labor costs	Geopolitical tensions and alliances
217	574	ZlJBKVl	Chemical		Chemical	Latin America	Latin America	10+ Years	C-Level	Inflence and make decisions	Expert																			Strongly agree	Strongly agree	Agree	Agree	Strongly agree	Strongly agree	Agree	Strongly agree	Agree	Strongly agree	Agree	Agree	Strongly agree	Geopolitical tensions and alliances	Proximity to low-cost renewable energy as a resource for green hydrogen	Low labor costs	Supportive policy framework with access to government subsidies or tax breaks for climate-friendly investments	Location of existing production site
218	575	KXP0byR	Chemical		Chemical	Latin America	Latin America	6-9 Years	C-Level	Inflence and make decisions	Expert																			Agree	Strongly agree	Agree	Agree	Strongly agree	Strongly agree	Agree	Strongly agree	Agree	Strongly agree	Agree	Strongly agree	Agree	Skilled workforce	Low labor costs	Supportive policy framework with access to government subsidies or tax breaks for climate-friendly investments	Proximity to markets for climate-friendly industrial products	Overall investment climate and financing conditions/capital costs
219	580	rM5oV7z	Chemical		Chemical	Latin America	Latin America	6-9 Years	Vice President or Above	Inflence and make decisions	Expert																			Strongly agree	Agree	Strongly agree	Agree	Strongly agree	Strongly agree	Agree	Strongly agree	Agree	Strongly agree	Agree	Agree	Strongly agree	Proximity to low-cost renewable energy as a resource for green hydrogen	Supportive policy framework with access to government subsidies or tax breaks for climate-friendly investments	Overall investment climate and financing conditions/capital costs	Proximity to markets for climate-friendly industrial products	Trade barriers, such as tariffs, quotas or local content requirements
220	582	lvA6ZWY	Chemical		Chemical	Latin America	Latin America	6-9 Years	Vice President or Above	Inflence and make decisions	Expert																			Strongly agree	Strongly agree	Agree	Disagree	Strongly agree	Disagree	Strongly agree	Agree	Strongly agree	Disagree	Strongly agree	Strongly agree	Agree	Trade barriers, such as tariffs, quotas or local content requirements	Supportive policy framework with access to government subsidies or tax breaks for climate-friendly investments	Proximity to low-cost renewable energy as a resource for green hydrogen	Skilled workforce	Proximity to markets for climate-friendly industrial products
221	583	0nLl67B	Chemical		Chemical	Latin America	Latin America	6-9 Years	Vice President or Above	Inflence and make decisions	Expert																			Strongly agree	Agree	Strongly agree	Strongly agree	Agree	Strongly agree	Agree	Disagree	Agree	Strongly agree	Agree	Strongly agree	Agree	Proximity to low-cost renewable energy as a resource for green hydrogen	Supportive policy framework with access to government subsidies or tax breaks for climate-friendly investments	Trade barriers, such as tariffs, quotas or local content requirements	Skilled workforce	Proximity to industrial clusters in your sector or a related sector
222	585	7mKx85V	Chemical		Chemical	Latin America	Latin America	10+ Years	C-Level	Inflence and make decisions	Expert																			Agree	Strongly agree	Agree	Agree	Strongly agree	Agree	Agree	Strongly agree	Strongly agree	Agree	Agree	Strongly agree	Agree	Proximity to low-cost renewable energy as a resource for green hydrogen	Skilled workforce	Low labor costs	Overall investment climate and financing conditions/capital costs	Proximity to low cost low natural gas as a feedstock for blue hydrogen
223	587	mWn5vLO	Chemical		Chemical	Latin America	Latin America	10+ Years	Senior Director or Senior Manager	Inflence and make decisions	Expert																			Agree	Strongly agree	Disagree	Agree	Strongly agree	Strongly agree	Disagree	Agree	Agree	Disagree	Agree	Disagree	Strongly agree	Trade barriers, such as tariffs, quotas or local content requirements	Supportive policy framework with access to government subsidies or tax breaks for climate-friendly investments	Skilled workforce	Overall investment climate and financing conditions/capital costs	Logistical infrastructure conditions
224	592	jv4yxjz	Chemical		Chemical	Asia	Asia	10+ Years	Vice President or Above	Inflence and make decisions	Expert																			Agree	Strongly agree	Strongly agree	Agree	Strongly agree	Strongly agree	Agree	Agree	Agree	Strongly agree	Strongly agree	Agree	Strongly agree	Supportive policy framework with access to government subsidies or tax breaks for climate-friendly investments	Skilled workforce	Proximity to low-cost renewable energy as a resource for green hydrogen	Proximity to industrial clusters in your sector or a related sector	Low labor costs
225	593	da6veRd	Chemical		Chemical	Asia	Asia	6-9 Years	Vice President or Above	Inflence and make decisions	Expert																			Strongly agree	Agree	Strongly agree	Agree	Strongly agree	Agree	Strongly agree	Strongly agree	Agree	Agree	Disagree	Disagree	Strongly agree	Proximity to low-cost renewable energy as a resource for green hydrogen	Supportive policy framework with access to government subsidies or tax breaks for climate-friendly investments	Trade barriers, such as tariffs, quotas or local content requirements	Skilled workforce	Low labor costs
226	595	R7dXeEp	Chemical		Chemical	Asia	Asia	10+ Years	Senior Director or Senior Manager	Inflence and make decisions	Expert																			Strongly agree	Agree	Disagree	Agree	Agree	Strongly agree	Agree	Strongly agree	Strongly agree	Agree	Agree	Strongly agree	Agree	Proximity to low-cost renewable energy as a resource for green hydrogen	Supportive policy framework with access to government subsidies or tax breaks for climate-friendly investments	Low labor costs	Proximity to markets for climate-friendly industrial products	Logistical infrastructure conditions
227	596	W7vKM8J	Chemical		Chemical	Asia	Asia	6-9 Years	Vice President or Above	Inflence and make decisions	Expert																			Strongly agree	Agree	Agree	Strongly agree	Strongly agree	Agree	Strongly agree	Strongly agree	Agree	Agree	Strongly agree	Strongly agree	Agree	Proximity to low-cost renewable energy as a resource for green hydrogen	Supportive policy framework with access to government subsidies or tax breaks for climate-friendly investments	Low labor costs	Proximity to markets for climate-friendly industrial products	Overall investment climate and financing conditions/capital costs
228	597	YV2ZdeK	Chemical		Chemical	Asia	Asia	6-9 Years	Senior Director or Senior Manager	Inflence and make decisions	Expert																			Strongly agree	Agree	Strongly agree	Strongly agree	Agree	Strongly agree	Agree	Agree	Strongly agree	Strongly agree	Agree	Agree	Strongly agree	Proximity to low-cost renewable energy as a resource for green hydrogen	Supportive policy framework with access to government subsidies or tax breaks for climate-friendly investments	Low labor costs	Proximity to markets for climate-friendly industrial products	Overall investment climate and financing conditions/capital costs
229	598	VZ9rpq2	Chemical		Chemical	Asia	Asia	6-9 Years	Vice President or Above	Inflence and make decisions	Expert																			Strongly agree	Agree	Agree	Strongly agree	Agree	Strongly agree	Agree	Agree	Strongly agree	Strongly agree	Agree	Agree	Agree	Proximity to low-cost renewable energy as a resource for green hydrogen	Supportive policy framework with access to government subsidies or tax breaks for climate-friendly investments	Low labor costs	Trade barriers, such as tariffs, quotas or local content requirements	Proximity to industrial clusters in your sector or a related sector
230	602	yrbKvpN	Chemical		Chemical	Asia	Asia	6-9 Years	Vice President or Above	Inflence and make decisions	Expert																			Strongly agree	Agree	Agree	Strongly agree	Agree	Strongly agree	Agree	Disagree	Agree	Agree	Strongly agree	Agree	Agree	Proximity to low-cost renewable energy as a resource for green hydrogen	Trade barriers, such as tariffs, quotas or local content requirements	Skilled workforce	Proximity to industrial clusters in your sector or a related sector	Logistical infrastructure conditions
231	603	7mQZVOB	Chemical		Chemical	Asia	Asia	10+ Years	Vice President or Above	Inflence and make decisions	Expert																			Strongly agree	Agree	Strongly agree	Strongly agree	Strongly agree	Strongly agree	Agree	Agree	Strongly agree	Strongly agree	Agree	Agree	Strongly agree	Geopolitical tensions and alliances	Trade barriers, such as tariffs, quotas or local content requirements	Skilled workforce	Proximity to markets for climate-friendly industrial products	Overall investment climate and financing conditions/capital costs
232	604	P7gLZYx	Chemical		Chemical	Asia	Asia	6-9 Years	Vice President or Above	Inflence and make decisions	Expert																			Strongly agree	Disagree	Agree	Agree	Disagree	Agree	Agree	Disagree	Strongly agree	Agree	Disagree	Agree	Agree	Geopolitical tensions and alliances	Trade barriers, such as tariffs, quotas or local content requirements	Supportive policy framework with access to government subsidies or tax breaks for climate-friendly investments	Low labor costs	Overall investment climate and financing conditions/capital costs
233	605	oqrRn17	Chemical		Chemical	Asia	Asia	6-9 Years	Senior Director or Senior Manager	Inflence and make decisions	Expert																			Agree	Agree	Disagree	Strongly agree	Agree	Agree	Disagree	Strongly agree	Agree	Agree	Strongly agree	Agree	Agree	Supportive policy framework with access to government subsidies or tax breaks for climate-friendly investments	Geopolitical tensions and alliances	Trade barriers, such as tariffs, quotas or local content requirements	Proximity to industrial clusters in your sector or a related sector	Proximity to markets for climate-friendly industrial products
234	608	zva1qap	Chemical		Chemical	Asia	Asia	3-5 Years	Senior Director or Senior Manager	Inflence and make decisions	Expert																			Agree	Disagree	Strongly agree	Agree	Agree	Agree	Disagree	Disagree	Strongly agree	Agree	Agree	Disagree	Agree	Supportive policy framework with access to government subsidies or tax breaks for climate-friendly investments	Trade barriers, such as tariffs, quotas or local content requirements	Low labor costs	Proximity to markets for climate-friendly industrial products	Skilled workforce
235	610	8GQ08Ra	Steel		Steel	Asia	Asia	6-9 Years	Senior Director or Senior Manager	Inflence and make decisions	Expert	Strongly agree	Agree	Agree	Strongly agree	Disagree	Strongly agree	Agree	Strongly agree	Strongly agree	Disagree	Agree	Agree	Strongly agree	Proximity to low-cost renewable energy as a resource for green hydrogen	Supportive policy framework with access to government subsidies or tax breaks for climate-friendly investments	Low labor costs	Proximity to industrial clusters in your sector or a related sector	Overall investment climate and financing conditions/capital costs
236	611	ErXApxb	Steel		Steel	Asia	Asia	6-9 Years	Senior Director or Senior Manager	Inflence and make decisions	Expert	Agree	Agree	Strongly agree	Strongly agree	Strongly agree	Strongly agree	Agree	Strongly agree	Agree	Agree	Strongly agree	Strongly agree	Agree	Location of existing production site	Geopolitical tensions and alliances	Trade barriers, such as tariffs, quotas or local content requirements	Skilled workforce	Proximity to industrial clusters in your sector or a related sector
237	612	Njl8RoJ	Chemical		Chemical	Asia	Asia	6-9 Years	Senior Director or Senior Manager	Inflence and make decisions	Informed, but not an expert																			Agree	Disagree	Strongly agree	Agree	Strongly agree	Strongly agree	Disagree	Disagree	Agree	Agree	Disagree	Strongly agree	Agree	Trade barriers, such as tariffs, quotas or local content requirements	Geopolitical tensions and alliances	Supportive policy framework with access to government subsidies or tax breaks for climate-friendly investments	Proximity to markets for climate-friendly industrial products	Skilled workforce
238	614	vzgO56l	Steel		Steel	Asia	Asia	6-9 Years	Vice President or Above	Inflence and make decisions	Informed, but not an expert	Strongly agree	Strongly agree	Agree	Disagree	Disagree	Agree	Strongly agree	Disagree	Agree	Strongly agree	Disagree	Strongly agree	Agree	Location of existing production site	Proximity to low-cost renewable energy as a resource for green hydrogen	Supportive policy framework with access to government subsidies or tax breaks for climate-friendly investments	Low labor costs	Skilled workforce
239	616	2vQOzX7	Steel		Steel	Asia	Asia	6-9 Years	Senior Director or Senior Manager	Inflence and make decisions	Informed, but not an expert	Strongly agree	Disagree	Strongly agree	Disagree	Agree	Strongly agree	Disagree	Disagree	Agree	Agree	Disagree	Agree	Agree	Location of existing production site	Geopolitical tensions and alliances	Supportive policy framework with access to government subsidies or tax breaks for climate-friendly investments	Low labor costs	Proximity to markets for climate-friendly industrial products
240	617	YV2ZZqx	Chemical		Chemical	Asia	Asia	6-9 Years	Senior Director or Senior Manager	Inflence and make decisions	Informed, but not an expert																			Agree	Disagree	Disagree	Strongly agree	Agree	Agree	Disagree	Disagree	Strongly agree	Agree	Strongly agree	Strongly agree	Disagree	Geopolitical tensions and alliances	Location of existing production site	Low labor costs	Proximity to markets for climate-friendly industrial products	Skilled workforce
241	618	J4K7qQq	Chemical		Chemical	Asia	Asia	6-9 Years	Vice President or Above	Inflence and make decisions	Informed, but not an expert																			Strongly agree	Agree	Strongly agree	Agree	Agree	Agree	Disagree	Strongly agree	Agree	Agree	Disagree	Strongly agree	Agree	Supportive policy framework with access to government subsidies or tax breaks for climate-friendly investments	Trade barriers, such as tariffs, quotas or local content requirements	Low labor costs	Proximity to markets for climate-friendly industrial products	Logistical infrastructure conditions
242	619	oqr8geG	Steel		Steel	Oceania-Pacific	Oceania-Pacific	6-9 Years	Senior Director or Senior Manager	Inflence and make decisions	Expert	Agree	Disagree	Strongly agree	Agree	Agree	Strongly agree	Agree	Strongly agree	Strongly agree	Disagree	Agree	Strongly agree	Agree	Geopolitical tensions and alliances	Supportive policy framework with access to government subsidies or tax breaks for climate-friendly investments	Trade barriers, such as tariffs, quotas or local content requirements	Proximity to low-cost renewable energy as a resource for green hydrogen	Overall investment climate and financing conditions/capital costs
243	620	5oQ09VW	Steel		Steel	Oceania-Pacific	Oceania-Pacific	6-9 Years	Subject Matter Expert	Influence, but don't make decisions	Informed, but not an expert	Strongly agree	Strongly agree	Strongly agree	Agree	Agree	Agree	Strongly agree	Disagree	Disagree	Agree	Strongly agree	Agree	Strongly agree	Proximity to low-cost renewable energy as a resource for green hydrogen	Supportive policy framework with access to government subsidies or tax breaks for climate-friendly investments	Low labor costs	Skilled workforce	Proximity to industrial clusters in your sector or a related sector
244	621	P7gXVNW	Steel		Steel	Asia	Asia	6-9 Years	Senior Director or Senior Manager	Inflence and make decisions	Expert	Strongly agree	Agree	Strongly agree	Agree	Agree	Agree	Disagree	Strongly agree	Agree	Agree	Strongly agree	Strongly agree	Agree	Proximity to low-cost renewable energy as a resource for green hydrogen	Trade barriers, such as tariffs, quotas or local content requirements	Overall investment climate and financing conditions/capital costs	Proximity to low cost low natural gas as a feedstock for blue hydrogen	Skilled workforce
245	622	YV2lKOW	Steel		Steel	Oceania-Pacific	Oceania-Pacific	3-5 Years	Subject Matter Expert	Influence, but don't make decisions	Expert	Agree	Strongly agree	Strongly agree	Strongly agree	Agree	Strongly agree	Agree	Strongly agree	Disagree	Agree	Strongly agree	Agree	Strongly agree	Geopolitical tensions and alliances	Low labor costs	Proximity to markets for climate-friendly industrial products	Logistical infrastructure conditions	Skilled workforce
246	623	q81LpZx	Steel		Steel	Oceania-Pacific	Oceania-Pacific	3-5 Years	Senior Director or Senior Manager	Inflence and make decisions	Informed, but not an expert	Strongly agree	Agree	Strongly agree	Agree	Strongly agree	Strongly agree	Agree	Strongly agree	Agree	Strongly agree	Disagree	Agree	Agree	Proximity to low-cost renewable energy as a resource for green hydrogen	Trade barriers, such as tariffs, quotas or local content requirements	Low labor costs	Supportive policy framework with access to government subsidies or tax breaks for climate-friendly investments	Proximity to markets for climate-friendly industrial products
247	624	jv47OQp	Steel		Steel	Oceania-Pacific	Oceania-Pacific	6-9 Years	Senior Director or Senior Manager	Inflence and make decisions	Expert	Agree	Agree	Agree	Disagree	Strongly agree	Strongly agree	Agree	Agree	Agree	Strongly agree	Agree	Strongly agree	Strongly agree	Geopolitical tensions and alliances	Trade barriers, such as tariffs, quotas or local content requirements	Proximity to low-cost renewable energy as a resource for green hydrogen	Low labor costs	Supportive policy framework with access to government subsidies or tax breaks for climate-friendly investments
248	625	VZ91O8G	Steel		Steel	Oceania-Pacific	Oceania-Pacific	6-9 Years	Senior Director or Senior Manager	Influence, but don't make decisions	Expert	Strongly agree	Strongly agree	Agree	Agree	Strongly agree	Strongly agree	Agree	Disagree	Strongly agree	Agree	Strongly agree	Agree	Strongly agree	Supportive policy framework with access to government subsidies or tax breaks for climate-friendly investments	Skilled workforce	Logistical infrastructure conditions	Proximity to industrial clusters in your sector or a related sector	Overall investment climate and financing conditions/capital costs
249	626	ErXy0Kg	Steel		Steel	Oceania-Pacific	Oceania-Pacific	3-5 Years	Senior Director or Senior Manager	Inflence and make decisions	Expert	Strongly agree	Strongly agree	Strongly agree	Agree	Agree	Strongly agree	Agree	Strongly agree	Agree	Agree	Strongly agree	Agree	Strongly agree	Low labor costs	Proximity to industrial clusters in your sector or a related sector	Overall investment climate and financing conditions/capital costs	Skilled workforce	Trade barriers, such as tariffs, quotas or local content requirements
250	627	Q7NzMRv	Steel		Steel	Oceania-Pacific	Oceania-Pacific	6-9 Years	Senior Director or Senior Manager	Inflence and make decisions	Informed, but not an expert	Agree	Agree	Strongly agree	Strongly agree	Strongly agree	Strongly agree	Agree	Agree	Strongly agree	Disagree	Strongly agree	Agree	Agree	Geopolitical tensions and alliances	Proximity to industrial clusters in your sector or a related sector	Logistical infrastructure conditions	Skilled workforce	Low labor costs
251	632	vzgJWMv	Steel		Steel	Oceania-Pacific	Oceania-Pacific	6-9 Years	Senior Director or Senior Manager	Inflence and make decisions	Expert	Strongly agree	Agree	Disagree	Agree	Disagree	Disagree	Strongly agree	Strongly agree	Agree	Disagree	Strongly agree	Agree	Agree	Proximity to low-cost renewable energy as a resource for green hydrogen	Low labor costs	Trade barriers, such as tariffs, quotas or local content requirements	Supportive policy framework with access to government subsidies or tax breaks for climate-friendly investments	Location of existing production site
252	633	98QN4aG	Steel		Steel	Oceania-Pacific	Oceania-Pacific	10+ Years	Subject Matter Expert	Inflence and make decisions	Informed, but not an expert	Agree	Agree	Strongly agree	Disagree	Disagree	Strongly agree	Agree	Disagree	Strongly agree	Strongly agree	Agree	Strongly agree	Disagree	Proximity to low-cost renewable energy as a resource for green hydrogen	Supportive policy framework with access to government subsidies or tax breaks for climate-friendly investments	Geopolitical tensions and alliances	Skilled workforce	Low labor costs
253	634	xvdKW4X	Chemical		Chemical	Oceania-Pacific	Oceania-Pacific	6-9 Years	Senior Director or Senior Manager	Inflence and make decisions	Expert																			Disagree	Strongly agree	Disagree	Agree	Strongly agree	Disagree	Agree	Strongly agree	Disagree	Disagree	Agree	Agree	Disagree	Proximity to low-cost renewable energy as a resource for green hydrogen	Location of existing production site	Trade barriers, such as tariffs, quotas or local content requirements	Supportive policy framework with access to government subsidies or tax breaks for climate-friendly investments	Proximity to industrial clusters in your sector or a related sector
254	636	7mQe9dV	Steel		Steel	Asia	Asia	3-5 Years	Senior Director or Senior Manager	Influence, but don't make decisions	Expert	Strongly agree	Agree	Agree	Strongly agree	Strongly agree	Strongly agree	Strongly agree	Agree	Strongly agree	Agree	Disagree	Agree	Agree	Supportive policy framework with access to government subsidies or tax breaks for climate-friendly investments	Skilled workforce	Low labor costs	Proximity to markets for climate-friendly industrial products	Geopolitical tensions and alliances
255	641	zvm4jZR	Steel		Steel	Latin America	Latin America	6-9 Years	Senior Director or Senior Manager	Inflence and make decisions	Expert	Agree	Agree	Agree	Agree	Disagree	Agree	Agree	Disagree	Disagree	Agree	Agree	Agree	Agree	Location of existing production site	Geopolitical tensions and alliances	Supportive policy framework with access to government subsidies or tax breaks for climate-friendly investments	Proximity to low cost low natural gas as a feedstock for blue hydrogen	Trade barriers, such as tariffs, quotas or local content requirements
256	644	G8qr6yo	Steel		Steel	Latin America	Latin America	10+ Years	C-Level	Inflence and make decisions	Expert	Agree	Agree	Agree	Strongly agree	Strongly agree	Agree	Strongly agree	Strongly agree	Agree	Disagree	Agree	Strongly agree	Agree	Supportive policy framework with access to government subsidies or tax breaks for climate-friendly investments	Proximity to markets for climate-friendly industrial products	Logistical infrastructure conditions	Skilled workforce	Overall investment climate and financing conditions/capital costs
257	647	zvm4b5L	Chemical		Chemical	North America	North America	3-5 Years	C-Level	Inflence and make decisions	Expert																			Strongly agree	Agree	Agree	Strongly agree	Agree	Strongly agree	Agree	Strongly agree	Agree	Strongly agree	Agree	Strongly agree	Agree	Geopolitical tensions and alliances	Low labor costs	Supportive policy framework with access to government subsidies or tax breaks for climate-friendly investments	Proximity to markets for climate-friendly industrial products	Logistical infrastructure conditions
258	648	G8qrxlN	Chemical		Chemical	North America	North America	3-5 Years	C-Level	Inflence and make decisions	Expert																			Strongly agree	Agree	Agree	Agree	Agree	Agree	Strongly agree	Strongly agree	Agree	Agree	Agree	Agree	Strongly agree	Geopolitical tensions and alliances	Low labor costs	Skilled workforce	Overall investment climate and financing conditions/capital costs	Proximity to industrial clusters in your sector or a related sector
259	649	0nqlALl	Steel		Steel	Latin America	Latin America	3-5 Years	Senior Director or Senior Manager	Inflence and make decisions	Expert	Agree	Agree	Agree	Agree	Disagree	Agree	Agree	Strongly agree	Disagree	Disagree	Agree	Agree	Disagree	Proximity to low-cost renewable energy as a resource for green hydrogen	Skilled workforce	Supportive policy framework with access to government subsidies or tax breaks for climate-friendly investments	Overall investment climate and financing conditions/capital costs	Proximity to markets for climate-friendly industrial products
260	651	damo0EO	Chemical		Chemical	North America	North America	3-5 Years	C-Level	Inflence and make decisions	Expert																			Agree	Strongly agree	Agree	Disagree	Agree	Agree	Strongly agree	Agree	Disagree	Agree	Strongly agree	Agree	Disagree	Proximity to low-cost renewable energy as a resource for green hydrogen	Trade barriers, such as tariffs, quotas or local content requirements	Low labor costs	Skilled workforce	Overall investment climate and financing conditions/capital costs
261	652	ZlmBOJz	Steel		Steel	Latin America	Latin America	3-5 Years	Senior Director or Senior Manager	Inflence and make decisions	Expert	Strongly agree	Disagree	Agree	Disagree	Agree	Agree	Strongly agree	Disagree	Agree	Strongly agree	Agree	Agree	Disagree	Skilled workforce	Geopolitical tensions and alliances	Logistical infrastructure conditions	Location of existing production site	Proximity to industrial clusters in your sector or a related sector
262	653	vzmoa5l	Steel		Steel	Latin America	Latin America	6-9 Years	Senior Director or Senior Manager	Inflence and make decisions	Expert	Strongly agree	Strongly agree	Agree	Agree	Agree	Agree	Agree	Strongly agree	Strongly agree	Agree	Strongly agree	Strongly agree	Agree	Low labor costs	Skilled workforce	Logistical infrastructure conditions	Trade barriers, such as tariffs, quotas or local content requirements	Proximity to low-cost renewable energy as a resource for green hydrogen
263	654	ArqLVBZ	Chemical		Chemical	North America	North America	3-5 Years	C-Level	Inflence and make decisions	Expert																			Strongly agree	Agree	Strongly agree	Agree	Strongly agree	Strongly agree	Strongly agree	Agree	Strongly agree	Agree	Strongly agree	Agree	Strongly agree	Location of existing production site	Geopolitical tensions and alliances	Trade barriers, such as tariffs, quotas or local content requirements	Skilled workforce	Overall investment climate and financing conditions/capital costs
264	655	bGmoMar	Steel		Steel	Latin America	Latin America	3-5 Years	Senior Director or Senior Manager	Inflence and make decisions	Expert	Strongly agree	Agree	Agree	Agree	Disagree	Agree	Agree	Disagree	Agree	Strongly agree	Agree	Agree	Agree	Low labor costs	Proximity to low-cost renewable energy as a resource for green hydrogen	Logistical infrastructure conditions	Proximity to low cost low natural gas as a feedstock for blue hydrogen	Proximity to markets for climate-friendly industrial products
265	656	5oqbvYx	Chemical		Chemical	North America	North America	3-5 Years	C-Level	Inflence and make decisions	Expert																			Strongly agree	Agree	Strongly agree	Agree	Strongly agree	Agree	Strongly agree	Strongly agree	Agree	Strongly agree	Agree	Strongly agree	Strongly agree	Proximity to low-cost renewable energy as a resource for green hydrogen	Location of existing production site	Trade barriers, such as tariffs, quotas or local content requirements	Proximity to industrial clusters in your sector or a related sector	Overall investment climate and financing conditions/capital costs
266	669	Q7qAKMb	Chemical		Chemical	North America	North America	10+ Years	Senior Director or Senior Manager	Influence, but don't make decisions	Expert																			Agree	Agree	Agree	Agree	Disagree	Agree	Agree	Strongly agree	Agree	Disagree	Agree	Agree	Agree	Low labor costs	Proximity to markets for climate-friendly industrial products	Location of existing production site	Supportive policy framework with access to government subsidies or tax breaks for climate-friendly investments	Trade barriers, such as tariffs, quotas or local content requirements
267	670	1nq2VEz	Chemical		Chemical	North America	North America	10+ Years	Vice President or Above	Inflence and make decisions	Expert																			Agree	Strongly agree	Agree	Strongly agree	Agree	Agree	Strongly agree	Agree	Strongly agree	Agree	Strongly agree	Agree	Strongly agree	Supportive policy framework with access to government subsidies or tax breaks for climate-friendly investments	Proximity to low-cost renewable energy as a resource for green hydrogen	Proximity to industrial clusters in your sector or a related sector	Trade barriers, such as tariffs, quotas or local content requirements	Proximity to markets for climate-friendly industrial products
268	671	xvmLlzj	Chemical		Chemical	North America	North America	10+ Years	Vice President or Above	Inflence and make decisions	Expert																			Agree	Strongly agree	Agree	Strongly agree	Agree	Agree	Strongly agree	Agree	Strongly agree	Agree	Strongly agree	Agree	Strongly agree	Proximity to low-cost renewable energy as a resource for green hydrogen	Supportive policy framework with access to government subsidies or tax breaks for climate-friendly investments	Proximity to markets for climate-friendly industrial products	Overall investment climate and financing conditions/capital costs	Proximity to industrial clusters in your sector or a related sector
269	672	mWLJ6dM	Steel		Steel	North America	North America	10+ Years	Senior Director or Senior Manager	Inflence and make decisions	Expert	Strongly agree	Strongly agree	Agree	Strongly agree	Strongly agree	Agree	Strongly disagree	Strongly agree	Strongly disagree	Agree	Strongly agree	Strongly agree	Strongly agree	Proximity to low-cost renewable energy as a resource for green hydrogen	Location of existing production site	Low labor costs	Proximity to markets for climate-friendly industrial products	Overall investment climate and financing conditions/capital costs
270	675	jvj75Ap	Steel		Steel	Oceania-Pacific	Oceania-Pacific	3-5 Years	Senior Director or Senior Manager	Inflence and make decisions	Expert	Agree	Disagree	Agree	Disagree	Agree	Agree	Disagree	Disagree	Agree	Agree	Agree	Disagree	Agree	Proximity to low-cost renewable energy as a resource for green hydrogen	Location of existing production site	Trade barriers, such as tariffs, quotas or local content requirements	Supportive policy framework with access to government subsidies or tax breaks for climate-friendly investments	Proximity to markets for climate-friendly industrial products
271	682	BKb8xzq	Steel		Steel	Oceania-Pacific	Asia	6-9 Years	Senior Director or Senior Manager	Inflence and make decisions	Expert	Agree	Disagree	Agree	Strongly agree	Agree	Strongly agree	Strongly agree	Disagree	Agree	Strongly agree	Agree	Strongly agree	Agree	Geopolitical tensions and alliances	Supportive policy framework with access to government subsidies or tax breaks for climate-friendly investments	Low labor costs	Proximity to low-cost renewable energy as a resource for green hydrogen	Skilled workforce
272	683	n29QNLX	Steel		Steel	Oceania-Pacific	Asia	6-9 Years	Senior Director or Senior Manager	Influence, but don't make decisions	Expert	Agree	Strongly agree	Agree	Strongly agree	Strongly agree	Strongly agree	Strongly agree	Agree	Strongly agree	Disagree	Agree	Strongly agree	Agree	Geopolitical tensions and alliances	Proximity to low-cost renewable energy as a resource for green hydrogen	Trade barriers, such as tariffs, quotas or local content requirements	Supportive policy framework with access to government subsidies or tax breaks for climate-friendly investments	Low labor costs
273	684	YV85NMx	Steel		Steel	Oceania-Pacific	Asia	3-5 Years	Senior Director or Senior Manager	Influence, but don't make decisions	Informed, but not an expert	Strongly agree	Agree	Strongly agree	Agree	Agree	Agree	Strongly agree	Agree	Strongly agree	Agree	Strongly agree	Agree	Disagree	Proximity to low-cost renewable energy as a resource for green hydrogen	Geopolitical tensions and alliances	Trade barriers, such as tariffs, quotas or local content requirements	Skilled workforce	Proximity to markets for climate-friendly industrial products
274	685	5ozOGdW	Steel		Steel	Oceania-Pacific	Asia	3-5 Years	Senior Director or Senior Manager	Inflence and make decisions	Expert	Strongly agree	Agree	Strongly agree	Strongly agree	Agree	Strongly agree	Agree	Strongly agree	Disagree	Agree	Strongly agree	Agree	Agree	Location of existing production site	Supportive policy framework with access to government subsidies or tax breaks for climate-friendly investments	Trade barriers, such as tariffs, quotas or local content requirements	Geopolitical tensions and alliances	Low labor costs
275	686	zvRQx47	Steel		Steel	Oceania-Pacific	Asia	6-9 Years	Senior Director or Senior Manager	Inflence and make decisions	Informed, but not an expert	Agree	Strongly agree	Strongly agree	Disagree	Agree	Strongly agree	Agree	Strongly agree	Disagree	Agree	Strongly agree	Agree	Strongly agree	Proximity to low-cost renewable energy as a resource for green hydrogen	Supportive policy framework with access to government subsidies or tax breaks for climate-friendly investments	Trade barriers, such as tariffs, quotas or local content requirements	Low labor costs	Skilled workforce
276	687	bGKQ9zr	Steel		Steel	Oceania-Pacific	Asia	3-5 Years	Senior Director or Senior Manager	Inflence and make decisions	Expert	Strongly agree	Strongly agree	Agree	Agree	Strongly agree	Strongly agree	Agree	Agree	Disagree	Disagree	Agree	Strongly agree	Agree	Proximity to low-cost renewable energy as a resource for green hydrogen	Supportive policy framework with access to government subsidies or tax breaks for climate-friendly investments	Low labor costs	Proximity to industrial clusters in your sector or a related sector	Overall investment climate and financing conditions/capital costs
277	688	pvGQ2YE	Chemical		Chemical	Oceania-Pacific	Oceania-Pacific	10+ Years	Senior Director or Senior Manager	Influence, but don't make decisions	Informed, but not an expert																			Disagree	Strongly agree	Agree	Agree	Disagree	Agree	Strongly agree	Agree	Agree	Disagree	Disagree	Strongly agree	Disagree	Skilled workforce	Geopolitical tensions and alliances	Supportive policy framework with access to government subsidies or tax breaks for climate-friendly investments	Overall investment climate and financing conditions/capital costs	Proximity to markets for climate-friendly industrial products
278	689	vzPQ2KM	Steel		Steel	Oceania-Pacific	Oceania-Pacific	6-9 Years	Vice President or Above	Inflence and make decisions	Expert	Disagree	Disagree	Strongly agree	Agree	Disagree	Agree	Strongly agree	Disagree	Disagree	Agree	Disagree	Agree	Agree	Supportive policy framework with access to government subsidies or tax breaks for climate-friendly investments	Proximity to low-cost renewable energy as a resource for green hydrogen	Skilled workforce	Geopolitical tensions and alliances	Proximity to markets for climate-friendly industrial products
279	690	xv5Q2Zq	Chemical		Chemical	Oceania-Pacific	Oceania-Pacific	6-9 Years	C-Level	Inflence and make decisions	Informed, but not an expert																			Disagree	Agree	Agree	Strongly agree	Disagree	Agree	Strongly agree	Strongly agree	Disagree	Agree	Agree	Strongly agree	Disagree	Geopolitical tensions and alliances	Supportive policy framework with access to government subsidies or tax breaks for climate-friendly investments	Proximity to low-cost renewable energy as a resource for green hydrogen	Proximity to industrial clusters in your sector or a related sector	Overall investment climate and financing conditions/capital costs
280	691	8GrKB59	Chemical		Chemical	Oceania-Pacific	Oceania-Pacific	6-9 Years	Senior Director or Senior Manager	Influence, but don't make decisions	Expert																			Agree	Strongly agree	Agree	Agree	Disagree	Agree	Strongly agree	Disagree	Agree	Agree	Disagree	Disagree	Strongly agree	Trade barriers, such as tariffs, quotas or local content requirements	Geopolitical tensions and alliances	Skilled workforce	Overall investment climate and financing conditions/capital costs	Proximity to markets for climate-friendly industrial products
281	692	BKbO7Go	Chemical		Chemical	Africa	Africa	10+ Years	C-Level	Inflence and make decisions	Expert																			Agree	Agree	Agree	Strongly agree	Disagree	Agree	Agree	Disagree	Agree	Disagree	Agree	Agree	Disagree	Proximity to low-cost renewable energy as a resource for green hydrogen	Trade barriers, such as tariffs, quotas or local content requirements	Skilled workforce	Overall investment climate and financing conditions/capital costs	Proximity to markets for climate-friendly industrial products
282	693	G8noyX8	Chemical		Chemical	Europe	Europe	6-9 Years	Senior Director or Senior Manager	Inflence and make decisions	Expert																			Agree	Agree	Agree	Strongly agree	Agree	Agree	Strongly agree	Strongly agree	Agree	Strongly agree	Strongly agree	Agree	Strongly agree	Geopolitical tensions and alliances	Low labor costs	Proximity to markets for climate-friendly industrial products	Overall investment climate and financing conditions/capital costs	Trade barriers, such as tariffs, quotas or local content requirements
283	694	8GZbGOX	Chemical		Chemical	North America	North America	10+ Years	Senior Director or Senior Manager	Inflence and make decisions	Expert																			Agree	Agree	Agree	Agree	Agree	Agree	Agree	Agree	Agree	Disagree	Agree	Agree	Agree	Location of existing production site	Proximity to low-cost renewable energy as a resource for green hydrogen	Geopolitical tensions and alliances	Skilled workforce	Proximity to industrial clusters in your sector or a related sector
284	696	2vzbPxR	Chemical		Chemical	North America	North America	10+ Years	C-Level	Inflence and make decisions	Informed, but not an expert																			Strongly agree	Agree	Agree	Agree	Agree	Agree	Agree	Strongly agree	Agree	Agree	Agree	Strongly agree	Agree	Geopolitical tensions and alliances	Proximity to markets for climate-friendly industrial products	Overall investment climate and financing conditions/capital costs	Proximity to low cost low natural gas as a feedstock for blue hydrogen	Trade barriers, such as tariffs, quotas or local content requirements
285	698	2vzpvrb	Chemical		Chemical	North America	North America	10+ Years	Senior Director or Senior Manager	Inflence and make decisions	Expert																			Strongly agree	Strongly agree	Strongly agree	Strongly agree	Agree	Strongly agree	Strongly agree	Strongly agree	Strongly agree	Strongly agree	Strongly agree	Strongly agree	Strongly agree	Skilled workforce	Overall investment climate and financing conditions/capital costs	Proximity to markets for climate-friendly industrial products	Geopolitical tensions and alliances	Logistical infrastructure conditions
286	702	mWvybAp	Chemical		Chemical	North America	North America	10+ Years	Senior Director or Senior Manager	Inflence and make decisions	Informed, but not an expert																			Agree	Agree	Agree	Agree	Agree	Strongly agree	Strongly agree	Strongly agree	Strongly agree	Strongly agree	Strongly agree	Strongly agree	Strongly agree	Proximity to low-cost renewable energy as a resource for green hydrogen	Logistical infrastructure conditions	Proximity to low cost low natural gas as a feedstock for blue hydrogen	Proximity to industrial clusters in your sector or a related sector	Proximity to markets for climate-friendly industrial products
287	706	4lJL6X9	Chemical		Chemical	North America	North America	6-9 Years	Senior Director or Senior Manager	Inflence and make decisions	Expert																			Agree	Disagree	Strongly agree	Agree	Disagree	Agree	Strongly agree	Agree	Strongly agree	Agree	Strongly agree	Disagree	Agree	Proximity to low-cost renewable energy as a resource for green hydrogen	Proximity to industrial clusters in your sector or a related sector	Logistical infrastructure conditions	Proximity to low cost low natural gas as a feedstock for blue hydrogen	Geopolitical tensions and alliances
288	709	Zl4XPr6	Chemical		Chemical	North America	North America	6-9 Years	Vice President or Above	Inflence and make decisions	Expert																			Strongly agree	Strongly agree	Strongly agree	Strongly agree	Strongly agree	Strongly agree	Strongly agree	Strongly agree	Strongly agree	Strongly agree	Strongly agree	Strongly agree	Strongly agree	Skilled workforce	Supportive policy framework with access to government subsidies or tax breaks for climate-friendly investments	Proximity to low cost low natural gas as a feedstock for blue hydrogen	Proximity to industrial clusters in your sector or a related sector	Low labor costs
289	713	0n4NbBz	Steel		Steel	Europe	Africa	10+ Years	Subject Matter Expert	Inflence and make decisions	Expert	Disagree	Disagree	Agree	Strongly agree	Strongly agree	Agree	Strongly agree	Agree	I don't know	Disagree	Agree	Strongly agree	Agree	Skilled workforce	Supportive policy framework with access to government subsidies or tax breaks for climate-friendly investments	Proximity to markets for climate-friendly industrial products	Overall investment climate and financing conditions/capital costs	Proximity to low cost low natural gas as a feedstock for blue hydrogen
290	716	O7WZMye	Steel		Steel	North America	North America	6-9 Years	Senior Director or Senior Manager	Inflence and make decisions	Expert	Strongly agree	Agree	Agree	Strongly agree	Strongly agree	Strongly agree	Agree	Strongly agree	I don't know	Strongly agree	Strongly agree	Agree	Strongly agree	Proximity to low-cost renewable energy as a resource for green hydrogen	Location of existing production site	Proximity to markets for climate-friendly industrial products	Supportive policy framework with access to government subsidies or tax breaks for climate-friendly investments	Proximity to low cost low natural gas as a feedstock for blue hydrogen
291	720	YVLB8Xz	Steel		Steel	North America	North America	10+ Years	Vice President or Above	Inflence and make decisions	Expert	Agree	Strongly agree	Agree	Strongly agree	Agree	Strongly agree	Strongly agree	Strongly agree	Strongly agree	Strongly agree	Strongly agree	Strongly agree	Strongly agree	Location of existing production site	Supportive policy framework with access to government subsidies or tax breaks for climate-friendly investments	Skilled workforce	Trade barriers, such as tariffs, quotas or local content requirements	Proximity to low cost low natural gas as a feedstock for blue hydrogen
292	722	yrWQMWq	Steel		Steel	Oceania-Pacific	Oceania-Pacific	3-5 Years	Vice President or Above	Inflence and make decisions	Expert	Agree	Agree	Agree	Agree	Agree	Agree	Strongly agree	Agree	Agree	Strongly agree	Agree	Agree	Agree	Location of existing production site	Geopolitical tensions and alliances	Low labor costs	Skilled workforce	Proximity to markets for climate-friendly industrial products
293	723	4lJzYZq	Chemical		Chemical	Oceania-Pacific	Oceania-Pacific	1-2 Years	C-Level	Influence, but don't make decisions	Informed, but not an expert																			Agree	Strongly agree	Strongly disagree	Agree	Strongly agree	Agree	Disagree	Agree	Agree	Agree	Strongly disagree	Disagree	Agree	Proximity to low-cost renewable energy as a resource for green hydrogen	Skilled workforce	Supportive policy framework with access to government subsidies or tax breaks for climate-friendly investments	Trade barriers, such as tariffs, quotas or local content requirements	Location of existing production site
294	724	eZedKdX	Steel		Steel	North America	North America	3-5 Years	Senior Director or Senior Manager	Inflence and make decisions	Expert	Disagree	Strongly agree	Agree	Agree	Strongly agree	Agree	Strongly agree	Agree	Agree	Strongly agree	Agree	Agree	Disagree	Skilled workforce	Logistical infrastructure conditions	Proximity to industrial clusters in your sector or a related sector	Low labor costs	Geopolitical tensions and alliances
295	729	Zl4nQKq	Steel		Steel	North America	North America	3-5 Years	Senior Director or Senior Manager	Inflence and make decisions	Expert	Agree	Agree	Agree	Agree	Agree	Agree	Strongly agree	Agree	Strongly agree	Strongly agree	Strongly agree	Agree	Agree	Location of existing production site	Geopolitical tensions and alliances	Low labor costs	Skilled workforce	Proximity to industrial clusters in your sector or a related sector
296	730	O7WnpEm	Steel		Steel	Asia	Oceania-Pacific	6-9 Years	Senior Director or Senior Manager	Inflence and make decisions	Informed, but not an expert	Agree	Agree	Strongly agree	Agree	Disagree	Strongly agree	Strongly agree	Agree	Strongly agree	Strongly agree	Strongly agree	Agree	Strongly agree	Supportive policy framework with access to government subsidies or tax breaks for climate-friendly investments	Proximity to low-cost renewable energy as a resource for green hydrogen	Trade barriers, such as tariffs, quotas or local content requirements	Overall investment climate and financing conditions/capital costs	Proximity to low cost low natural gas as a feedstock for blue hydrogen
297	733	VZqRv22	Steel		Steel	North America	North America	10+ Years	Senior Director or Senior Manager	Inflence and make decisions	Informed, but not an expert	Strongly agree	Agree	Agree	Agree	Agree	Agree	Strongly agree	Strongly agree	Agree	Agree	Strongly agree	Agree	Strongly agree	Proximity to low-cost renewable energy as a resource for green hydrogen	Proximity to markets for climate-friendly industrial products	Proximity to low cost low natural gas as a feedstock for blue hydrogen	Supportive policy framework with access to government subsidies or tax breaks for climate-friendly investments	Overall investment climate and financing conditions/capital costs
298	736	jvae4Xm	Steel		Steel	Oceania-Pacific	Oceania-Pacific	10+ Years	Senior Director or Senior Manager	Inflence and make decisions	Expert	Agree	Agree	Agree	Agree	Disagree	Agree	Agree	Agree	Agree	Agree	Agree	Agree	I don't know	Proximity to low-cost renewable energy as a resource for green hydrogen	Location of existing production site	Skilled workforce	Overall investment climate and financing conditions/capital costs	Logistical infrastructure conditions
299	737	q8n91l2	Steel		Steel	Oceania-Pacific	Oceania-Pacific	6-9 Years	Senior Director or Senior Manager	Influence, but don't make decisions	Informed, but not an expert	Agree	Agree	Agree	Agree	Agree	Agree	Strongly agree	Strongly agree	Disagree	Agree	Agree	Agree	Disagree	Skilled workforce	Location of existing production site	Supportive policy framework with access to government subsidies or tax breaks for climate-friendly investments	Proximity to markets for climate-friendly industrial products	Low labor costs
300	739	Zl4Lp4q	Steel		Steel	North America	North America	6-9 Years	Subject Matter Expert	Influence, but don't make decisions	Expert	Strongly agree	Strongly agree	Agree	Agree	Strongly agree	Strongly agree	Agree	Strongly agree	Disagree	Strongly agree	Strongly agree	Disagree	Strongly agree	Location of existing production site	Low labor costs	Proximity to markets for climate-friendly industrial products	Proximity to industrial clusters in your sector or a related sector	Trade barriers, such as tariffs, quotas or local content requirements
301	815	O7Px8mX	Chemical		Chemical	North America	North America	10+ Years	Senior Director or Senior Manager	Inflence and make decisions	Expert																			Agree	Agree	Agree	Agree	Agree	Strongly agree	Agree	Agree	Disagree	Agree	Agree	Agree	Disagree	Supportive policy framework with access to government subsidies or tax breaks for climate-friendly investments	Proximity to markets for climate-friendly industrial products	Proximity to low cost low natural gas as a feedstock for blue hydrogen	Logistical infrastructure conditions	Skilled workforce
302	817	mW4NJnr	Steel		Steel	North America	North America	6-9 Years	Subject Matter Expert	Inflence and make decisions	Expert	Disagree	Strongly agree	Agree	Agree	Disagree	Strongly agree	Disagree	Agree	Agree	Disagree	Strongly agree	Disagree	Agree	Geopolitical tensions and alliances	Proximity to markets for climate-friendly industrial products	Supportive policy framework with access to government subsidies or tax breaks for climate-friendly investments	Proximity to low cost low natural gas as a feedstock for blue hydrogen	Overall investment climate and financing conditions/capital costs
303	818	Zlr71Jq	Chemical		Chemical	North America	North America	6-9 Years	Subject Matter Expert	Influence, but don't make decisions	Informed, but not an expert																			Strongly agree	Agree	Strongly agree	Agree	Agree	Agree	Agree	Strongly agree	Agree	Strongly agree	Strongly agree	Agree	Agree	Low labor costs	Supportive policy framework with access to government subsidies or tax breaks for climate-friendly investments	Proximity to industrial clusters in your sector or a related sector	Geopolitical tensions and alliances	Proximity to low cost low natural gas as a feedstock for blue hydrogen
304	819	BK4O6x1	Steel		Steel	North America	North America	10+ Years	Senior Director or Senior Manager	Inflence and make decisions	Expert	Strongly agree	Strongly agree	Strongly agree	Strongly agree	Strongly agree	Strongly agree	Strongly agree	Strongly agree	Strongly agree	Strongly agree	Strongly agree	Strongly agree	Strongly agree	Location of existing production site	Supportive policy framework with access to government subsidies or tax breaks for climate-friendly investments	Skilled workforce	Proximity to markets for climate-friendly industrial products	Overall investment climate and financing conditions/capital costs
305	821	n2zdnNl	Steel		Steel	North America	North America	10+ Years	Vice President or Above	Inflence and make decisions	Expert	Agree	Agree	Strongly agree	Agree	Agree	Strongly agree	Agree	Strongly agree	Strongly disagree	Strongly agree	Strongly agree	Agree	Agree	Proximity to low-cost renewable energy as a resource for green hydrogen	Location of existing production site	Skilled workforce	Proximity to industrial clusters in your sector or a related sector	Logistical infrastructure conditions
306	822	YVOPo6x	Chemical		Chemical	North America	North America	6-9 Years	Senior Director or Senior Manager	Inflence and make decisions	Expert																			Agree	Agree	Strongly agree	Strongly agree	Agree	Agree	Disagree	Agree	Agree	Agree	Strongly agree	Agree	Agree	Proximity to low-cost renewable energy as a resource for green hydrogen	Trade barriers, such as tariffs, quotas or local content requirements	Location of existing production site	Low labor costs	Skilled workforce
307	824	N5P5e7g	Chemical		Chemical	Africa	Africa	3-5 Years	Senior Director or Senior Manager	Inflence and make decisions	Expert																			Strongly agree	Agree	Strongly agree	Strongly agree	Agree	Strongly agree	Agree	Agree	Disagree	Agree	Disagree	Disagree	Strongly agree	Supportive policy framework with access to government subsidies or tax breaks for climate-friendly investments	Location of existing production site	Trade barriers, such as tariffs, quotas or local content requirements	Low labor costs	Overall investment climate and financing conditions/capital costs
308	825	Ky2VBGL	Steel		Steel	Africa	Africa	3-5 Years	Senior Director or Senior Manager	Inflence and make decisions	Informed, but not an expert	Agree	Agree	Strongly agree	Strongly agree	Agree	Strongly agree	Strongly agree	Strongly agree	Agree	Agree	Strongly agree	Strongly agree	Agree	Supportive policy framework with access to government subsidies or tax breaks for climate-friendly investments	Proximity to industrial clusters in your sector or a related sector	Proximity to low cost low natural gas as a feedstock for blue hydrogen	Proximity to low-cost renewable energy as a resource for green hydrogen	Logistical infrastructure conditions
309	826	0Bo6nyP	Chemical		Chemical	Africa	Africa	3-5 Years	Subject Matter Expert	Inflence and make decisions	Expert																			Strongly agree	Strongly agree	Agree	Strongly agree	Strongly agree	Strongly agree	Agree	Strongly agree	Disagree	Agree	Strongly agree	Strongly agree	Agree	Location of existing production site	Proximity to low-cost renewable energy as a resource for green hydrogen	Skilled workforce	Supportive policy framework with access to government subsidies or tax breaks for climate-friendly investments	Overall investment climate and financing conditions/capital costs
310	830	1pyL6Mj	Steel		Steel	Africa	Africa	6-9 Years	Senior Director or Senior Manager	Inflence and make decisions	Informed, but not an expert	Agree	Agree	Agree	Agree	Agree	Strongly agree	Agree	Strongly agree	Disagree	Agree	Strongly agree	Agree	Agree	Overall investment climate and financing conditions/capital costs	Trade barriers, such as tariffs, quotas or local content requirements	Proximity to low-cost renewable energy as a resource for green hydrogen	Proximity to low cost low natural gas as a feedstock for blue hydrogen	Proximity to markets for climate-friendly industrial products
311	831	yxNQOoN	Steel		Steel	Africa	Africa	1-2 Years	Senior Director or Senior Manager	Inflence and make decisions	Informed, but not an expert	Agree	Agree	Agree	Agree	Agree	Agree	Agree	Disagree	Agree	Agree	Disagree	I don't know	Agree	Trade barriers, such as tariffs, quotas or local content requirements	Location of existing production site	Skilled workforce	Logistical infrastructure conditions	Proximity to low cost low natural gas as a feedstock for blue hydrogen
312	832	bbdYB7W	Chemical		Chemical	Africa	Africa	10+ Years	Senior Director or Senior Manager	Inflence and make decisions	Expert																			Strongly agree	Strongly agree	Agree	Strongly agree	Disagree	Strongly agree	Strongly agree	Agree	Agree	Agree	Strongly agree	Agree	Agree	Proximity to low-cost renewable energy as a resource for green hydrogen	Proximity to markets for climate-friendly industrial products	Skilled workforce	Location of existing production site	Logistical infrastructure conditions
